# Supplementary material
Source: ML conference proceedings conference paper supplement (https://proceedings.neurips.cc/paper_files/paper/2020/hash/1bd413de70f32142f4a33a94134c5690-Abstract.html)
Supplement: Supplementary file [file 1bd413de70f32142f4a33a94134c5690-Supplemental.pdf]

---

# Supplementary Material for the Paper: Optimal Tradeoffs Between Utility and Smoothness for Soft-Max Functions

---

Anonymous Author(s)

Affiliation

Address

email

## 1 A Lower Bounds for the Exponential Mechanism

2 In this section, we prove Theorems 3.2 and 3.3.

3 *Proof of Theorem 3.2.* Fix a soft-max function  $\mathbf{f} : \mathbb{R}^d \rightarrow \Delta_d$  that is  $\delta$ -approximate. It is well  
 4 known that the Rényi Divergence of order  $\alpha$  is a non-decreasing function of  $\alpha$  for  $\alpha \geq 1$ . Hence it  
 5 suffices to prove the statement of Theorem 3.2 for  $\alpha = 1$  where  $D_\alpha$  become the KL-divergence  $D_{\text{KL}}$ .  
 6 Observe also that without loss of generality we can assume that  $\mathbf{f}$  is permutation invariant, i.e., for  
 7 every permutation  $\pi$  of  $\{1, \dots, d\}$  and every  $x \in \mathbb{R}^d$ ,  $f(\pi(x)) = \pi(f(x))$ , where  $\pi(x)$  denotes the  
 8 vector  $(x_{\pi(1)}, \dots, x_{\pi(d)})$ . If this is not the case then we can define the function  $\mathbf{f}'$  which outputs  
 9 the expectation of  $\mathbf{f}$  over a random permutation of the coordinates of  $x$ . It is easy to see then that  
 10  $\mathbf{f}'$  has the same approximation and smoothness properties as  $\mathbf{f}$  and is permutation invariant. Hence  
 11 we assume that  $\mathbf{f}$  is permutation invariant.

12 Let  $a \in \mathbb{R}_+$ . We define the vector  $\mathbf{x}_a = (a, a, \dots, a)^T$ . For any  $a$  because of the permutation  
 13 invariance of  $\mathbf{f}$  we have that  $\mathbf{f}(\mathbf{x}_a) = (1/d, \dots, 1/d)$ . We define the vector  $\mathbf{y}^{(a,b)}$  to be equal to  $\mathbf{x}$   
 14 in all coordinates but 1 and equal to  $b > a$  at the 1st coordinate. That is

$$y_j^{(a,b)} = a \quad \text{for } j \neq 1$$

and  $y_1^{(a,b)} = b$

15 From the approximation guarantee at  $\mathbf{y}^{(a,b)}$  we have that

$$\left\| \mathbf{y}^{(a,b)} \right\|_\infty - \langle \mathbf{f}(\mathbf{y}^{(a,b)}), \mathbf{y}^{(a,b)} \rangle \leq \delta \implies$$

$$b - b f_1(\mathbf{y}^{(a,b)}) - a \left( 1 - f_1(\mathbf{y}^{(a,b)}) \right) \leq \delta$$

16 Let  $q = f_1(\mathbf{y}^{(a,b)})$ . Then we have

$$(b - a)(1 - q) \leq \delta.$$

17 This implies

$$q \geq 1 - \frac{\delta}{b - a}. \tag{A.1}$$

18 Also observe that because of the permutation invariance of  $\mathbf{f}$  it holds that  $f_i(\mathbf{y}^{(a,b)}) = (1-q)/(d-1)$   
 19 for any  $i > 1$ . Now we bound the KL-divergence of  $\mathbf{f}$  when applied to the vectors  $\mathbf{x}_a$  and  $\mathbf{y}^{(a,b)}$ :

$$\begin{aligned} D_{\text{KL}}\left(\mathbf{f}\left(\mathbf{y}^{(a,b)}\right)\|\mathbf{f}\left(\mathbf{x}_a\right)\right) &= \sum_{i=1}^d f_i\left(\mathbf{y}^{(a,b)}\right) \log\left(\frac{f_i\left(\mathbf{y}^{(a,b)}\right)}{f_i\left(\mathbf{x}_a\right)}\right) \\ &= q \log(dq) + (1-q) \log\left(\left(1-q\right) \frac{d}{d-1}\right) \\ &\geq q \log(d) - 1, \end{aligned}$$

where the last inequality follows from the fact that the binary entropy function  $H(q) = -q \log(q) - (1-q) \log(1-q)$  is upper bounded by 1 and the fact that  $\log(d) \geq \log(d-1)$ . Using also A.1 we  
 20 get that

$$D_{\text{KL}}\left(\mathbf{f}\left(\mathbf{y}^{(a,b)}\right)\|\mathbf{f}\left(\mathbf{x}_a\right)\right) \geq \left(1 - \frac{\delta}{b-a}\right) \log(d) - 1.$$

21 If we now set  $b-a = 2\delta$  then we get  $\|\mathbf{y}^{(a,b)} - \mathbf{x}_a\|_p = 2\delta$  and

$$D_{\text{KL}}\left(\mathbf{f}\left(\mathbf{y}^{(a,b)}\right)\|\mathbf{f}\left(\mathbf{x}_a\right)\right) \geq \frac{1}{2} \log(d) - 1.$$

22 Therefore,

$$\frac{D_{\text{KL}}\left(\mathbf{f}\left(\mathbf{y}^{(a,b)}\right)\|\mathbf{f}\left(\mathbf{x}_a\right)\right)}{\|\mathbf{y}^{(a,b)} - \mathbf{x}_a\|_p} \geq \frac{\log(d) - 2}{4\delta}$$

23 and the theorem follows.  $\square$

24 *Proof of Theorem 3.3.* Let  $\delta > 0$  and for the sake of contradiction assume that there exists a softmax  
 25 function  $\mathbf{f}$  that is both  $\delta$ -approximate in the worst-case and satisfies  $(\ell_p, D_\alpha)$ -Lipschitzness. We  
 26 define  $\mathbf{x} = (2\delta, 0, 0, \dots, 0)$  and  $\mathbf{y} = (0, 2\delta, 0, \dots, 0)$  from the worst-case approximation guarantees  
 27 of  $\mathbf{f}$  we have that  $\mathbf{f}(\mathbf{x}) = (1, 0, \dots, 0)$ , whereas  $\mathbf{f}(\mathbf{y}) = (0, 1, 0, \dots, 0)$ . It is easy to see that for  
 28 any  $\alpha \geq 1$  it holds that  $D_\alpha(\mathbf{f}(\mathbf{x})\|\mathbf{f}(\mathbf{y})) = \infty$  but  $\|\mathbf{f}(\mathbf{x}) - \mathbf{f}(\mathbf{y})\|_p \leq 2$ . The later contradicts the  
 29  $(\ell_p, D_\alpha)$ -Lipschitzness of  $\mathbf{f}$  and hence the theorem follows.  $\square$

## 30 B The Construction of PLSOFTMAX

31 We first give an intuitive explanation of the proof of the construction. One notion that will be useful  
 32 for this purpose in the following.

33 **Vector and Matrix Norms.** We define the  $(\alpha, \beta)$ -subordinate norm of a matrix  $\mathbf{A} \in \mathbb{R}^{d \times \ell}$  to be

$$\|\mathbf{A}\|_{\alpha, \beta} = \max_{\mathbf{x} \in \mathbb{R}^\ell, \mathbf{x} \neq 0} \|\mathbf{A}\mathbf{x}\|_\beta / \|\mathbf{x}\|_\alpha.$$

34 The computation of  $\|\mathbf{A}\|_{\alpha, \beta}$  is in general NP-hard and even hard to approximate, see [28, 16].

35 **Notation.** We use  $\mathbf{E}_{i,j}$  to refer to the all zero matrix with one 1 at the  $(i, j)$  entry.

36 The construction of PLSOFTMAX begins with the observation that for any  $\mathbf{g} : \mathbb{R}^d \rightarrow \mathbb{R}^d$  and any  
 37  $p, q \geq 1$ , it holds that

$$\|\mathbf{g}(\mathbf{x}) - \mathbf{g}(\mathbf{y})\|_q \leq \left( \max_{\boldsymbol{\xi} \in \mathbb{R}^d} \|\mathbf{J}_{\mathbf{g}}(\boldsymbol{\xi})\|_{p,q} \right) \|\mathbf{x} - \mathbf{y}\|_p$$

38 where  $\mathbf{J}_{\mathbf{g}}(\boldsymbol{\xi})$  is the Jacobian matrix of  $\mathbf{g}$  at the point  $\boldsymbol{\xi} \in \mathbb{R}^d$ . Hence our goal is to construct a  
 39 function  $\mathbf{g}$  that does not violate the worst-case approximation conditions and for which we can also  
 40 bound  $\|\mathbf{J}_{\mathbf{g}}(\boldsymbol{\xi})\|_{p,q}$ . To achieve this we carefully analyze the approximation conditions. Based on  
 41 them we split the space  $\mathbb{R}^d$  into small convex polytopes  $P_i$  such that in each  $P_i$ , the approximation  
 42 conditions do not change. Since, as we will see, the approximation condition is a linear condition,  
 43 we choose our function  $\mathbf{g}$  in  $P_i$  to be a linear function that satisfies the approximation condition

44 inside the polytope  $P_i$ . Then we have to make sure that on the boundaries of  $P_i$  the function is  
 45 continuous and that the  $(p, q)$ -subordinate norm of the matrices that we used in each  $P_i$  is bounded  
 46 by some constant.

47 One important observation is that in each  $P_i$ , if some of the  $[d]$  alternatives have low values, the  
 48 approximation constraint imposes that we cannot use at all any of these alternatives. Hence the  
 49 dimension of  $P_i$  effectively becomes less than  $d$ . In these cases, we reduce the construction in  $P_i$  to  
 50 a smaller dimensional construction that is solved inductively. We express this inductive argument as  
 51 a recursive relation over the matrices that is stated in Lemma B.4. Finally, one important theorem  
 52 that enables us to prove a precise bound on  $\|\mathbf{J}_g(\boldsymbol{\xi})\|_{p,1}$  is Theorem B.6. This is a generalization of  
 53 Theorem 1 of [10] which might be of independent interest.

54 Now that we described the high level idea of our construction, we dive in to the technical details.  
 55 The function  $\mathbf{f}$  that we are going to construct is a piece-wise linear function. So we first define the  
 56 notion of a piece-wise linear function in  $d$  dimensions.

57 **Definition B.1** (PIECE-WISE LINEAR FUNCTIONS). A function  $\mathbf{f} : \mathbb{R}^d \rightarrow \mathbb{R}^d$  is *piece-wise linear*  
 58 if there exist a finite partition  $\mathcal{P}_f = \{P_1, \dots, P_L\}$  of  $\mathbb{R}^d$  such that  $P_i$  is a convex polytope, for any  
 59  $i$  and any  $\mathbf{x} \in P_i$  there exists a unique matrix  $\mathbf{A}_i \in \mathbb{R}^{d \times d}$  and a unique vector  $\mathbf{b}_i \in \mathbb{R}^d$  such that

$$\mathbf{f}(\mathbf{x}) = \mathbf{A}_i \mathbf{x} + \mathbf{b}_i.$$

60 We use  $\mathcal{A}_f$  to refer to the set of matrices  $\{\mathbf{A}_1, \dots, \mathbf{A}_L\}$ .

61 Our construction proceeds in the following steps:

- 62 1. define the partition  $\mathcal{P}_f$  of  $\mathbb{R}^d$ , the matrix  $\mathbf{A}_i$ , and vector  $\mathbf{b}_i$  that we use for every  $P_i \in \mathcal{P}_f$ ,
- 63 2. describe the set  $\mathcal{A}_f$  and its properties,
- 64 3. prove that the defined  $\mathbf{f}$  is continuous on the boundaries of  $P_i$ 's,
- 65 4. prove that it has small absolute approximation loss, and
- 66 5. prove that  $\|\mathbf{A}_i\|_{p,1}$  is small and hence using Lemma B.2 conclude that  $\mathbf{f}$  is has small  
 67 Lipschitz constant.

68 For simplicity of the proof we will use  $\mathbf{f}$  to refer to  $\text{PLSOFTMAX}^\delta$  within the scope of this section.

## 69 B.1 Piece-wise linear functions

70 For piece-wise linear functions  $\mathbf{f}$ , we use the following lemma to establish the Lipschitz property.

71 **Lemma B.2.** *Let  $\mathbf{f} : \mathbb{R}^d \rightarrow \mathbb{R}^d$  be a continuous and piece-wise linear function and let  $p, q \geq 1$ ,  
 72 then*

$$\|\mathbf{f}(\mathbf{x}) - \mathbf{f}(\mathbf{y})\|_q \leq \left( \max_{\mathbf{A} \in \mathcal{A}_f} \|\mathbf{A}\|_{p,q} \right) \cdot \|\mathbf{x} - \mathbf{y}\|_p \quad \forall \mathbf{x}, \mathbf{y} \in \mathbb{R}^d$$

73 *Proof.* We first prove the single variable case, that is, we prove that for any continuous piece-wise  
 74 linear function  $\mathbf{g} : \mathbb{R} \rightarrow \mathbb{R}^d$  and if  $c = \max_{\mathbf{A} \in \mathcal{A}_g} \|\mathbf{A}\|_{p,q}$  then for any  $x, y \in \mathbb{R}$

$$\|\mathbf{g}(x) - \mathbf{g}(y)\|_q \leq c|x - y|.$$

75 Without loss of generality assume that  $x > y$ . Since  $\mathbf{g}$  is piece-wise linear, we have a sequence  $y =$   
 76  $x_1 < x_2 < \dots < x_L = x$  such that for any  $z \in [x_i, x_{i+1}] : \mathbf{g}(z) = \mathbf{a}_i z + \mathbf{b}_i$  for some  $\mathbf{a}_i, \mathbf{b}_i \in \mathbb{R}^d$ .  
 77 Also notice that since  $\mathbf{a}_i$  is a vector, by definition of subordinate norms,  $\|\mathbf{a}_i\|_{p,q} = \|\mathbf{a}_i\|_q$ . Now  
 78 because of the continuity of  $\mathbf{g}$

$$\begin{aligned} \|\mathbf{g}(x) - \mathbf{g}(y)\|_q &\leq \sum_{i=1}^{L-1} \|\mathbf{g}(x_{i+1}) - \mathbf{g}(x_i)\|_q = \sum_{i=1}^{L-1} \|\mathbf{a}_i(x_{i+1} - x_i)\|_q = \sum_{i=1}^{L-1} \|\mathbf{a}_i\|_q (x_{i+1} - x_i) \\ &\leq c \left( \sum_{i=1}^{L-1} (x_{i+1} - x_i) \right) = c(x - y). \end{aligned}$$

79 For the general case, let  $c = \max_{\mathbf{A} \in \mathcal{A}_f} \|\mathbf{A}\|_{p,q}$  and  $\mathbf{x}, \mathbf{y} \in \mathbb{R}^d$ . We define the following function  
80  $\mathbf{h} : [0, 1] \rightarrow \mathbb{R}^d$  which is easy to verify that is also continuous and piece-wise linear:

$$\mathbf{h}(t) = \mathbf{f}(t\mathbf{x} + (1-t)\mathbf{y}).$$

There exists a sequence  $0 = t_1 < t_2 < \dots < t_L = 1$ , such that for every  $i$ , the function  $f$  has a linear form  $f(\mathbf{u}) = \mathbf{A}_i\mathbf{u} + \mathbf{b}_i$  on the set  $\{t\mathbf{x} + (1-t)\mathbf{y} : t \in [t_i, t_{i+1}]\}$ . Therefore, for every  $t \in [t_i, t_{i+1}]$ , by the definition of  $\mathbf{h}$ ,

$$\mathbf{h}(t) = \mathbf{A}_i(t\mathbf{x} + (1-t)\mathbf{y}) + \mathbf{b}_i = \mathbf{A}_i(\mathbf{x} - \mathbf{y})t + \mathbf{b}_i + \mathbf{A}_i\mathbf{y}.$$

81 Therefore, on  $t \in [t_i, t_{i+1}]$ , the function  $\mathbf{h}$  has the linear form  $\mathbf{h}(t) = \mathbf{v}_i t + \mathbf{w}_i$  for  $\mathbf{v}_i = \mathbf{A}_i(\mathbf{x} - \mathbf{y})$   
82 and  $\mathbf{w}_i = \mathbf{A}_i\mathbf{y} + \mathbf{b}_i$ . Hence by the definition of the subordinate matrix norm we have that

$$\|\mathbf{v}_i\|_q = \|\mathbf{A}_i(\mathbf{x} - \mathbf{y})\|_q \leq \|\mathbf{A}_i\|_{p,q} \|\mathbf{x} - \mathbf{y}\|_p \leq c \|\mathbf{x} - \mathbf{y}\|_p.$$

83 Since  $i$  was arbitrary we have that  $c' = \max_{\mathbf{A} \in \mathcal{A}_h} \|\mathbf{A}\|_{p,q} \leq c \|\mathbf{x} - \mathbf{y}\|_p$ . Finally using the state-  
84 ment of the lemma for the single variable case that we already proved, we have that

$$\|\mathbf{f}(\mathbf{x}) - \mathbf{f}(\mathbf{y})\|_q = \|\mathbf{h}(1) - \mathbf{h}(0)\|_q \leq c'(1-0) \leq c \|\mathbf{x} - \mathbf{y}\|_p.$$

85 □

## 86 B.2 Properties of the Soft-Max Matrices

87 Recall the definition of the soft max matrices in Section 4.

88 **Definition B.3** (SOFT-MAX MATRICES). The soft max matrix  $\mathbf{SM}_{(k,d)} = (m_{ij}) \in \mathbb{R}^{d \times d}$  with  
89 parameters  $k, d$  is defined as follows

$$m_{11} = \frac{k-1}{k} \tag{B.1}$$

$$m_{ii} = \frac{1}{i} \quad \forall i \in [2, k] \tag{B.2}$$

$$m_{i1} = -\frac{1}{k} \quad \forall i \in [2, k] \tag{B.3}$$

$$m_{ij} = \frac{1}{j} - \frac{1}{j-1} \quad \forall j > i, j \in [2, k] \tag{B.4}$$

$$m_{ij} = 0 \quad \forall i, j \text{ s.t. } (i \in [k+1, d]) \vee (j \in [k+1, d]) \tag{B.5}$$

90 Schematically we have

$$\mathbf{SM}_{(k,d)} = \begin{pmatrix} \frac{k-1}{k} & -\frac{1}{2} & -\frac{1}{6} & \dots & -\frac{1}{k(k-1)} & 0 & \dots & 0 \\ -\frac{1}{k} & \frac{1}{2} & -\frac{1}{6} & \dots & -\frac{1}{k(k-1)} & 0 & \dots & 0 \\ -\frac{1}{k} & 0 & \frac{1}{3} & \dots & -\frac{1}{k(k-1)} & 0 & \dots & 0 \\ -\frac{1}{k} & 0 & 0 & \dots & -\frac{1}{k(k-1)} & 0 & \dots & 0 \\ \vdots & \vdots & \vdots & \ddots & \vdots & \vdots & \ddots & \vdots \\ -\frac{1}{k} & 0 & 0 & \dots & \frac{1}{k} & 0 & \dots & 0 \\ 0 & 0 & 0 & \dots & 0 & 0 & \dots & 0 \\ \vdots & \vdots & \vdots & \ddots & \vdots & \vdots & \ddots & \vdots \\ 0 & 0 & 0 & \dots & 0 & 0 & \dots & 0 \end{pmatrix}$$

91 We also define the columns and the rows of the soft max matrices as follows

$$\mathbf{SM}_{(k,d)} = \left( \begin{array}{c|c|c|c|c|c|c|c} \mathbf{m}_1^{(k,d)} & \mathbf{m}_2^{(k,d)} & \dots & \mathbf{m}_k^{(k,d)} & \mathbf{0} & \dots & \mathbf{0} & \end{array} \right) \tag{B.6}$$

$$\mathbf{SM}_{(k,d)} = \begin{pmatrix} - & \left(\mathbf{s}_1^{(k,d)}\right)^T & - \\ - & \left(\mathbf{s}_2^{(k,d)}\right)^T & - \\ & \vdots & \\ - & \left(\mathbf{s}_k^{(k,d)}\right)^T & - \\ - & \mathbf{0} & - \\ & \vdots & \\ - & \mathbf{0} & - \end{pmatrix} \quad (\text{B.7})$$

92 Below are some examples for  $d = 4$ .

$$\begin{aligned} \mathbf{SM}_{(1,4)} &= \begin{pmatrix} 0 & 0 & 0 & 0 \\ 0 & 0 & 0 & 0 \\ 0 & 0 & 0 & 0 \\ 0 & 0 & 0 & 0 \end{pmatrix} & \mathbf{SM}_{(2,4)} &= \begin{pmatrix} \frac{1}{2} & -\frac{1}{2} & 0 & 0 \\ -\frac{1}{2} & \frac{1}{2} & 0 & 0 \\ 0 & 0 & 0 & 0 \\ 0 & 0 & 0 & 0 \end{pmatrix} \\ \mathbf{SM}_{(3,4)} &= \begin{pmatrix} \frac{2}{3} & -\frac{1}{2} & -\frac{1}{6} & 0 \\ -\frac{1}{3} & \frac{1}{2} & -\frac{1}{6} & 0 \\ -\frac{1}{3} & 0 & \frac{1}{3} & 0 \\ 0 & 0 & 0 & 0 \end{pmatrix} & \mathbf{SM}_{(4,4)} &= \begin{pmatrix} \frac{3}{4} & -\frac{1}{2} & -\frac{1}{6} & -\frac{1}{12} \\ -\frac{1}{4} & \frac{1}{2} & -\frac{1}{6} & -\frac{1}{12} \\ -\frac{1}{4} & 0 & \frac{1}{3} & -\frac{1}{12} \\ -\frac{1}{4} & 0 & 0 & \frac{1}{4} \end{pmatrix} \end{aligned}$$

93 Now we prove some properties of the soft max matrices, that will help us latex prove the continuity  
94 and the smoothness of PLSOFTMAX.

95 **Lemma B.4.** For any  $d \in \mathbb{N}$  and  $k \in [d]$  the following recursive relation holds

$$\mathbf{SM}_{(k-1,d)} = \mathbf{SM}_{(k,d)} (\mathbf{I} + \mathbf{E}_{k,1} - \mathbf{E}_{k,k})$$

96 *Proof.* From (B.6) we have that

$$\mathbf{SM}_{(k,d)} (\mathbf{I} + \mathbf{E}_{k,1} - \mathbf{E}_{k,k}) = \begin{pmatrix} \mathbf{m}_1^{(k,d)} & \left| \mathbf{m}_k^{(k,d)} \right. & \left. \mathbf{m}_2^{(k,d)} \right. & \cdots & \left. \mathbf{m}_{k-1}^{(k,d)} \right. & \left. \mathbf{0} \right. & \cdots & \left. \mathbf{0} \right. \\ \left| \right. & \left| \right. & \left| \right. & & \left| \right. & \left| \right. & & \left| \right. \end{pmatrix}.$$

97 We now observe by the definition of the soft max matrices that for any  $d \in \mathbb{N}$ ,  $k, k' \in [d]$  and  
98  $j \in [2, \min\{k, k'\}]$  it holds that  $\mathbf{m}_j^{(k,d)} = \mathbf{m}_j^{(k',d)}$ . Hence we only have to prove that

$$\mathbf{m}_1^{(k-1,d)} = \mathbf{m}_1^{(k,d)} + \mathbf{m}_k^{(k,d)}$$

99 and the lemma follows. For this we have that

$$m_{11}^{(k,d)} + m_{1k}^{(k,d)} = \frac{k-1}{k} - \frac{1}{k(k-1)} = \frac{(k-1)^2 - 1}{k(k-1)} = \frac{k-2}{k-1} = m_{11}^{(k-1,d)}$$

100 also for  $i \in [2, k-1]$  we have that

$$m_{i1}^{(k,d)} + m_{ik}^{(k,d)} = -\frac{1}{k} - \frac{1}{k(k-1)} = -\frac{1}{k-1} = m_{i1}^{(k-1,d)}$$

101 and finally

$$m_{k1}^{(k,d)} + m_{kk}^{(k,d)} = -\frac{1}{k} + \frac{1}{k} = 0 = m_{k1}^{(k-1,d)}$$

102 and the lemma follows.  $\square$

103 **Lemma B.5.** Let  $r, t \in [d]$  with  $r > t$  and  $\mathbf{x} \in \mathbb{R}^d$  be a vector with the property that  $x_i = x_j = x$   
104 for any  $i, j \in [r, t]$  then the vector  $\mathbf{y} \in \mathbb{R}^d$  with

$$\mathbf{y} = \mathbf{SM}_{(k,d)} \mathbf{x}$$

105 has also the property  $y_i = y_j$  for any  $i, j \in [r, t]$ .

106 *Proof.* From (B.7) we have that

$$\mathbf{y} = \mathbf{SM}_{(k,d)} \mathbf{x} = \begin{pmatrix} \mathbf{s}_1^T \mathbf{x} \\ \mathbf{s}_2^T \mathbf{x} \\ \vdots \\ \mathbf{s}_k^T \mathbf{x} \\ 0 \\ \vdots \\ 0 \end{pmatrix}$$

107 where for simplicity we dropped the indicators  $(k, d)$  from the row vectors  $\mathbf{s}_i$  since we keep  $k, d$   
108 constant through the proof. Therefore we have that

$$\begin{pmatrix} y_r \\ y_{r+1} \\ \vdots \\ y_t \end{pmatrix} = \begin{pmatrix} \sum_{j=1}^{r-1} s_{rj} x_j + \left( \sum_{j=r}^t s_{rj} \right) x + \sum_{j=t+1}^d s_{rj} x_j \\ \sum_{j=1}^{r-1} s_{(r+1)j} x_j + \left( \sum_{j=r}^t s_{(r+1)j} \right) x + \sum_{j=t+1}^d s_{(r+1)j} x_j \\ \vdots \\ \sum_{j=1}^{r-1} s_{tj} x_j + \left( \sum_{j=r}^t s_{tj} \right) x + \sum_{j=t+1}^d s_{tj} x_j \end{pmatrix}$$

109 but by the definition of the soft max matrices we can easily see that for any  $i, i' \in [r, t]$  and  $j < r$   
110 or  $j > t$  it holds that  $s_{ij} = s_{i'j}$ . This observation together with the above calculations imply that it  
111 suffices to prove that for any  $i, i' \in [r, t]$  it holds that

$$\sum_{j=r}^t s_{ij} = \sum_{j=r}^t s_{i'j} \quad (\text{B.8})$$

112 also because of the symmetry of the zero entries of soft max matrices for  $t > k$  it suffices to prove  
113 this statement for  $t \leq k$ . We also consider two case  $r = 1$  and  $r > 1$ .

114  $\mathbf{r} = 1$ . For  $i = 1$  we have that

$$\sum_{j=r}^t s_{1j} = s_{11} + \sum_{j=2}^t s_{1j} = \frac{k-1}{k} - \sum_{j=2}^t \frac{1}{j(j-1)}$$

115 and using the following relation

$$\sum_{j=n}^m \frac{1}{j(j-1)} = \sum_{j=n}^m \left( \frac{1}{j-1} - \frac{1}{j} \right) = \frac{1}{m-1} - \frac{1}{n} \quad (\text{B.9})$$

116 we get that

$$\sum_{j=r}^t s_{1j} = \frac{k-1}{k} - \left( 1 - \frac{1}{t} \right) = \frac{1}{t} - \frac{1}{k}.$$

117 For  $i > 1$  we have that

$$\sum_{j=r}^t s_{ij} = s_{i1} + s_{ii} + \sum_{j=i+1}^t s_{ij} = -\frac{1}{k} + \frac{1}{i} - \sum_{j=i+1}^t \frac{1}{j(j-1)} \stackrel{(\text{B.9})}{=} -\frac{1}{k} + \frac{1}{i} - \left( \frac{1}{i} - \frac{1}{t} \right) = \frac{1}{t} - \frac{1}{k}.$$

118 Hence the sum  $\sum_{j=1}^t s_{ij}$  does not depend on  $i$  and the property (B.8) holds for  $r = 1$ .

119  $\mathbf{r} > 1$ . For any  $i \in [r, t]$  we have that

$$\sum_{j=r}^t s_{ij} = s_{ii} + \sum_{j=i+1}^t s_{ij} = \frac{1}{i} - \sum_{j=i+1}^t \frac{1}{j(j-1)} \stackrel{(\text{B.9})}{=} \frac{1}{i} - \left( \frac{1}{i} - \frac{1}{t} \right) = \frac{1}{t}$$

120 and again we observe that the sum  $\sum_{j=r}^t s_{ij}$  does not depend on  $i$  and the property (B.8) holds for  
121 any  $r > 1, r \leq t$ . This implies  $y_r = \dots = y_t$  and the lemma follows.  $\square$

122 Finally our goal is to bound  $\|\mathbf{SM}_{(k,d)}\|_{p,q}$  for any  $p, q \in [1, \infty]$ . Before that we give a proof of a  
 123 general property of the subordinate norm  $\|\cdot\|_{p,1}$ . This corresponds to the following generalization of the  
 124 Theorem 1 in [10]. Drakakis and Pearlmutter [10] only state the result for the  $\|\cdot\|_{2,1}$  norm although  
 125 their proof generalizes.

126 **Theorem B.6** (Generalization of Theorem 1 [10]). *Let  $\mathbf{A} \in \mathbb{R}^{t \times d}$  and  $p \in 2\mathbb{N}_+$ , then*

$$\|\mathbf{A}\|_{p,1} = \max_{\mathbf{s} \in \{-1,1\}^t} \|\mathbf{s}^T \mathbf{A}\|_r \quad \text{where } r = \frac{p}{p-1}.$$

127 *In particular the  $\ell_r$  norm is the dual norm of the  $\ell_p$  norm.*

128 *Proof of Theorem B.6.* Let  $\mathbf{a}_i^T$  be the  $i$  th row of the matrix  $\mathbf{A}$ . By the definition of the subordinate  
 129 norm we have that

$$\|\mathbf{A}\|_{p,1} = \max_{\mathbf{x} \in \mathbb{R}^d, \|\mathbf{x}\|_p=1} \|\mathbf{A}\mathbf{x}\|_1.$$

130 We first prove that the maximum of the above optimization problem lies in a region of the space  
 131 where  $\mathbf{a}_i^T \mathbf{x} \neq 0$  for all  $i \in [t]$ . This implies that we can find the maximum in a subspace of the  
 132 space where both the objective and the constraint are differentiable and hence we can use first order  
 133 conditions to determine the maximum. This is described in the following claim.

134 **Claim B.7.** *Let*

$$\mathbf{x} = \arg \max_{\mathbf{y} \in \mathbb{R}^d, \|\mathbf{y}\|_p=1} \|\mathbf{A}\mathbf{y}\|_1$$

135 *then for every  $i \in [t]$  holds that  $\mathbf{a}_i^T \mathbf{x} \neq 0$ .*

136 *Proof.* We prove this claim by contradiction. Let's assume without loss of generality that for  $i =$   
 137  $1, \dots, \ell$  its true that  $\mathbf{a}_i^T \mathbf{x} = 0$ , where  $\ell \in [t]$ . Then we define the vector  $\mathbf{z}$  as

$$\mathbf{z} = \frac{\mathbf{x} + \eta \mathbf{a}_1}{\|\mathbf{x} + \eta \mathbf{a}_1\|_p}$$

138 with  $\eta$  that can be either positive or negative and is small enough so that  $\text{sign}(\mathbf{a}_i^T \mathbf{x}) = \text{sign}(\mathbf{a}_i^T \mathbf{z})$ .  
 139 We define the following real valued function  $h : \mathbb{R} \rightarrow \mathbb{R}$  as  $h(\eta) = 1/\|\mathbf{x} + \eta \mathbf{a}_1\|_p$ . It is easy to  
 140 see that the first and the second derivative of  $h$  for  $\eta$  in the interval  $[-1, 1]$  are bounded. Hence by  
 141 Taylor's theorem we have that

$$h(\eta) = h(0) + h'(0)\eta + O(\eta^2).$$

142 By simple calculations it is also easy to see that  $h(0) = 1$  and  $h'(0) = \sum_{i=1}^t a_{1i} x_i^{p-1}$ . Let also  
 143  $s_i = \text{sign}(\mathbf{a}_i^T \mathbf{x})$ . This implies

$$\begin{aligned} \sum_{i=1}^t |\mathbf{a}_i^T \mathbf{z}| &= \left( \sum_{i=1}^t |\mathbf{a}_i^T \mathbf{x}| + |\eta| \sum_{i=1}^{\ell} |\mathbf{a}_i^T \mathbf{a}_1| + \eta \sum_{i=\ell+1}^t s_i \mathbf{a}_i^T \mathbf{a}_1 \right) (h(0) + h'(0)\eta + O(\eta^2)) \\ &= \sum_{i=1}^t |\mathbf{a}_i^T \mathbf{x}| + |\eta| \sum_{i=1}^{\ell} |\mathbf{a}_i^T \mathbf{a}_1| + \left( \sum_{i=\ell+1}^t s_i \mathbf{a}_i^T \mathbf{a}_1 + \sum_{i=1}^t |\mathbf{a}_i^T \mathbf{x}| \right) \eta + O(\eta^2) \\ &= \sum_{i=1}^t |\mathbf{a}_i^T \mathbf{x}| + C_1 |\eta| + C_2 \eta + O(\eta^2) \end{aligned}$$

144 Now without loss of generality we can assume that  $\mathbf{a}_1 \neq \mathbf{0}$  and hence  $C_1 > 0$ . Also choosing the  
 145 correct sign for  $\eta$  we can have  $C_2 \eta \geq 0$ . Finally we can make  $\eta$  small enough so that  $C_1 |\eta| + C_2 \eta +$   
 146  $O(\eta^2) > 0$  and hence  $\sum_{i=1}^t |\mathbf{a}_i^T \mathbf{z}| > \sum_{i=1}^t |\mathbf{a}_i^T \mathbf{x}|$  which contradicts the assumption that  $\mathbf{x}$  was the  
 147 maximum and the claim follows.  $\square$

148 Using Claim B.7 we can see that the maximum of the program  $\left( \max_{\mathbf{x} \in \mathbb{R}^d, \|\mathbf{x}\|_p=1} \|\mathbf{A}\mathbf{x}\|_1 \right)$  is  
 149 achieved for a vector that belongs to an open subset of the space where both the constraint and

150 the objective function are differentiable. Notice that the differentiability of the constraint follows  
 151 from the fact that  $p$  is an even number.

152 Using Lagrangian multipliers we can find the solution to this optimization problem using first order  
 153 conditions on the following function

$$g(\mathbf{x}, \lambda) = \sum_{i=1}^t \left| \sum_{j=1}^d a_{ij} x_j \right| + \lambda (\|\mathbf{x}\|_p - 1)$$

154 which using the definition  $s_i = \text{sign}(\mathbf{a}_i^T \mathbf{x})$  takes the form

$$g(\mathbf{x}, \lambda) = \sum_{i=1}^t s_i \sum_{j=1}^d a_{ij} x_j + \lambda (\|\mathbf{x}\|_p - 1).$$

155 We now compute the partial derivative of  $g$  with respect to  $x_k$  for some  $k \in [d]$ .

$$\frac{\partial g}{\partial x_k} = \sum_{i=1}^t s_i a_{ik} + \lambda \frac{x_k^{p-1}}{\|\mathbf{x}\|_p^{p-1}} = \sum_{i=1}^t s_i a_{ik} + \lambda x_k^{p-1}$$

156 hence  $\frac{\partial g}{\partial x_k} = 0$  implies

$$x_k = -\frac{1}{\lambda^{1/(p-1)}} \left( \sum_{i=1}^t s_i a_{ik} \right)^{1/(p-1)} \quad (\text{B.10})$$

157 and therefore

$$\|\mathbf{x}\|_p = \frac{1}{|\lambda|^{1/(p-1)}} \|\mathbf{s}^T \mathbf{A}\|_{p/(p-1)}^{1/(p-1)}.$$

158 From the constraint  $\frac{\partial g}{\partial \lambda} = 0$  we get that

$$|\lambda| = \|\mathbf{s}^T \mathbf{A}\|_{p/(p-1)}.$$

159 Using (B.10) and the definition of the function  $g$  we have that

$$\begin{aligned} g(\mathbf{x}, \lambda) &= \sum_{i=1}^t s_i \sum_{j=1}^d a_{ij} x_j = \sum_{j=1}^d \left( \sum_{i=1}^t s_i a_{ij} \right) x_j \\ &\stackrel{(\text{B.10})}{=} \sum_{j=1}^d \left( -\lambda x_j^{p-1} \right) x_j \\ &= -\lambda \sum_{j=1}^d x_j^p = \|\mathbf{s}^T \mathbf{A}\|_r \end{aligned}$$

160 where  $r = \frac{p}{p-1}$ , and the theorem follows. □

161 **Lemma B.8.** For any  $d \in \mathbb{N}$ ,  $k \in [d]$  and  $p, q \in [1, \infty]$  we have that

$$\|\mathbf{SM}_{(k,d)}\|_{p,q} \leq 2 \min \left\{ p + 1, \frac{q}{q-1}, \log(k) \right\}.$$

162 *Proof.* It is easy to see from the definition that  $\|\mathbf{SM}_{(k,d)}\|_{p,q} = \|\mathbf{SM}_{(k,k)}\|_{p,q}$ . Hence we can  
 163 restrict our attention to the matrices  $\mathbf{SM}_{(k,k)}$  which for simplicity we call  $\mathbf{SM}_k$ .

164 Our first goal is to prove for even  $p$  that  $\|\mathbf{SM}_k\|_{p,1} \leq 2p$  and since  $\|\mathbf{x}\|_{p-1} \geq \|\mathbf{x}\|_p$  we can  
 165 conclude that  $\|\mathbf{SM}_k\|_{p-1,1} \leq \|\mathbf{SM}_k\|_{p,1} \leq 2p$ . This implies  $\|\mathbf{SM}_k\|_{p,1} \leq 2(p+1)$  for any  $p$ .

166 **Claim B.9.** It holds that  $\|\mathbf{SM}_k\|_{p,1} \leq 2(p+1)$  for any  $p \in [1, \infty]$ .



167 *Proof.* Using the Theorem B.6 and setting  $r = p/(p - 1)$  we have that

$$\|\mathbf{SM}_k\|_{p,1} = \max_{\mathbf{z} \in \{-1,1\}^k} \|\mathbf{z}^T \mathbf{SM}_k\|_p.$$

168 Now for every column  $\mathbf{m}_i$  of  $\mathbf{SM}_k$  we observe that the sum of the coordinates is zero, that is  
 169  $\sum_{j=1}^k m_{ji} = 0$ . Also all the element except the diagonal elements are non-positive and hence it is  
 170 true that

$$\sum_{j=1}^k |m_{ji}| = 2m_{ii}.$$

171 But obviously  $|\mathbf{z}^T \mathbf{m}_i| \leq \sum_{j=1}^k |m_{ji}|$  for all  $\mathbf{z} \in \{-1,1\}^k$ . This implies that  $|\mathbf{z}^T \mathbf{m}_i| \leq 2m_{ii} =$   
 172  $2/i$ . Therefore for any  $\mathbf{z} \in \{-1,1\}^k$  we have that

$$\|\mathbf{z}^T \mathbf{SM}_k\|_r = \left( \sum_{i=1}^k |\mathbf{z}^T \mathbf{m}_i|^r \right)^{1/r} \leq 2 \left( \sum_{i=1}^k \frac{1}{i^r} \right)^{1/r} \leq 2(\zeta(r))^{1/r} \quad (\text{B.11})$$

173 where  $\zeta(x)$  is the Riemann zeta function evaluated at  $x$ . Now we use the formula (2.1.16) of Chapter  
 174 2.1 of [31] and we get that

$$\zeta\left(\frac{p}{p-1}\right) \leq p.$$

175 This implies that

$$\|\mathbf{z}^T \mathbf{SM}_k\|_r \leq 2p^{(p-1)/p} \leq 2p.$$

176 This holds for any even  $p$  since only in this case we can use Theorem B.6, and this implies that for  
 177 any  $p$

$$\|\mathbf{z}^T \mathbf{SM}_k\|_r \leq 2p^{(p-1)/p} \leq 2(p+1)$$

178 as we argued in the beginning of the proof. □

179 Now it is obvious that  $\|\cdot\|_{p,q} \leq \|\cdot\|_{p,1}$  and hence we have that  $\|\mathbf{SM}_{(k,d)}\|_{p,q} \leq 2(p+1)$ .

180 Also, for any  $p$  and any vector  $\mathbf{v} \in \mathbb{R}^d$ , we have  $\max_{\mathbf{x}: \|\mathbf{x}\|_p=1} |\mathbf{v}^T \mathbf{x}| = \|\mathbf{v}\|_{q/(q-1)}$ . Applying this  
 181 on rows of any matrix  $A$ , we get

$$\|A\|_{p,q} \leq \left( \sum_i \|\mathbf{a}_i\|_{p/(p-1)}^q \right)^{1/q}.$$

182 Therefore, for every  $q > 1$ , and using the formula (2.1.16) of Chapter 2.1 of [31] and we get that

$$\|\mathbf{SM}_{(k,d)}\|_{p,q} \leq \left( \sum_{i=1}^k \frac{1}{i^q} \right)^{1/q} < \zeta(q)^{1/q} < \frac{q}{q-1}.$$

183 Finally we can use (B.11) and see that for any  $q, p$

$$\|\mathbf{z}^T \mathbf{SM}_k\|_q \leq 2 \left( \sum_{i=1}^k \frac{1}{i} \right) \leq 2 \log k$$

184 and this completes the proof of the lemma. □

### 185 B.3 Proof of Theorem 4.3

186 We first prove that  $\mathbf{f}$  is continuous and that its output is always a probability distribution over the  $d$   
 187 coordinates, i.e. that its output belongs to  $\Delta_{d-1}$ .

188 **Continuity of  $\mathbf{f}$ .** From the definition of  $\mathbf{f}$  is easy to see that  $\mathbf{f}$  is piecewise linear, since it remains  
 189 linear for all the regions where the order of the coordinates of  $\mathbf{x}$  is fixed and  $k_{\mathbf{x}}$  is fixed. It is easy to  
 190 see that the set of these regions is a finite set and each region is a convex set. More formally

$$\mathcal{P}_{\mathbf{f}} = \left\{ \{\mathbf{x} \mid (x_{\pi(1)} \geq x_{\pi(2)} \geq \dots \geq x_{\pi(d)}) \wedge (x_{\pi(1)} - x_{\pi(k)} \leq \delta)\} \mid \pi : [d] \rightarrow [d], k \in [d] \right\}$$

191 where  $\pi$  has to be a permutation. Also the set of matrices that  $\mathbf{f}$  uses is the following

$$\mathcal{A}_{\mathbf{f}} = \left\{ \frac{1}{\delta} \mathbf{P}^T \mathbf{S} \mathbf{M}_{(k,d)} \mathbf{P} \mid k \in \mathbb{N}, \mathbf{P} \text{ permutation matrix} \right\}.$$

192 So its is clear that  $\mathbf{f}$  is piecewise linear, but it is not clear that it should be continuous. To prove the  
 193 continuity of  $\mathbf{f}$  we will use the Lemmas B.4, B.5. Since  $\mathbf{f}$  is piecewise linear the only regions where  
 194  $\mathbf{f}$  might not be continuous are the boundaries of the regions  $P_i \in \mathcal{P}_{\mathbf{f}}$ . There are two types of such  
 195 boundaries one because of the change of the value  $k_{\mathbf{x}}$  and because the ordering in  $\mathbf{x}$  changes. First  
 196 consider the boundaries because of the change of  $k_{\mathbf{x}}$  which for simplicity we call  $k$  for the proof.  
 197 At the boundaries where  $k$  decreases we have that  $x_1 - x_k = \delta$  which implies  $x_k = x_1 - \delta$ . If we  
 198 apply this in the definition of  $\mathbf{f}$ , then we get

$$\begin{aligned} \mathbf{f}(\mathbf{x}) &= \frac{1}{\delta} \mathbf{S} \mathbf{M}_{(k,d)} \cdot \mathbf{x} + \mathbf{u}_k = \frac{1}{\delta} (\mathbf{S} \mathbf{M}_{(k,d)} (\mathbf{I}_d + \mathbf{E}_{k,1} - \mathbf{E}_{k,k})) \mathbf{x} + \frac{1}{\delta} \delta \mathbf{m}_k^{(k,d)} + \mathbf{u}_k \\ &= \frac{1}{\delta} \mathbf{S} \mathbf{M}_{(k-1,d)} \cdot \mathbf{x} + \mathbf{m}_k^{(k,d)} + \mathbf{u}_k \\ &= \frac{1}{\delta} \mathbf{S} \mathbf{M}_{(k-1,d)} \cdot \mathbf{x} + \mathbf{u}_{k-1} \end{aligned}$$

199 where at the second step we used Lemma B.4. This implies that at these boundaries the function  
 200 remains continuous. The transition for  $k$  to higher  $k$  can be proved exactly the same way. Now we  
 201 consider the case where the ordering of  $\mathbf{x}$  changes. In this case we will have that for any two indices  
 202  $i, j \in [d]$  that are changing order it is true that  $x_i = x_j$ . But from B.5 and the definition of  $\mathbf{f}(\mathbf{x})$  we  
 203 have that  $f_i(\mathbf{x}) = f_j(\mathbf{x})$ . This implies that the relative order of  $x_i$  and  $x_j$  does not change the value  
 204 of  $\mathbf{f}$ . Hence in the boundaries where the coordinates of  $\mathbf{x}$  change order  $\mathbf{f}$  is continuous. Finally in  
 205 any boundary that combines a change in  $k$  and a change in the ordering of the coordinates of  $\mathbf{x}$  we  
 206 can combine the above arguments and prove that  $\mathbf{f}$  is continuous at these boundaries too.

207 **Output of  $\mathbf{f}$  in  $\Delta_{d-1}$ .** We fix  $k_{\mathbf{x}}$  to be  $k$  and we consider without loss of generality a vector  $\mathbf{x}$  that  
 208 satisfies

$$x_1 \geq x_2 \geq \dots \geq x_d. \quad (\text{B.12})$$

209 Therefore

$$\mathbf{f}(\mathbf{x}) = \frac{1}{\delta} \mathbf{S} \mathbf{M}_{(k,d)} \cdot \mathbf{x} + \mathbf{u}_k.$$

210 From the definition of softmax matrices we have that for any column  $\mathbf{m}_j$  of  $\mathbf{S} \mathbf{M}_{(k,d)}$ ,  $\sum_{i=1}^d m_{ij} =$   
 211 0 and since  $\sum_{i=1}^d u_{ki} = 1$  we have that for any  $\mathbf{x} \in \mathbb{R}^d$ ,  $\sum_{i=1}^d f_i(\mathbf{x}) = 1$ . Hence it remains to  
 212 prove that  $f_i(\mathbf{x}) \geq 0$ .

213 Let  $\mathbf{s}_i^T$  be the  $i$ th row of  $\mathbf{S} \mathbf{M}_{(k,d)}$ . For  $i > k$  we have  $\mathbf{s}_i^T = \mathbf{0}^T$  and  $u_{ki} = 0$ , hence  $f_i(\mathbf{x}) = 0$ . On  
 214 the other hand, if  $i \leq k$ , we have that for

$$f_i(\mathbf{x}) = \frac{1}{\delta} \sum_{j=1}^d s_{ij} x_j + \frac{1}{k} = -\frac{1}{\delta k} x_1 + \frac{1}{\delta i} x_i + \frac{1}{\delta} \sum_{j=i+1}^k s_{ij} x_j + \frac{1}{k}$$

215 but for  $j > i$   $s_{ij} \leq 0$  and because of (B.12) we have that

$$f_i(\mathbf{x}) \geq -\frac{1}{\delta k} x_1 + \frac{1}{\delta} \left( \frac{1}{i} + \sum_{j=i+1}^k s_{ij} \right) x_2 + \frac{1}{k} = -\frac{1}{\delta k} x_1 + \frac{1}{\delta} \left( \sum_{j=i}^k s_{ij} \right) x_2 = -\frac{1}{\delta k} (x_1 - x_2) + \frac{1}{k}$$

216 now by the definition of  $k$  we have that  $-(x_1 - x_2) \geq -\delta$  and hence

$$f_i(\mathbf{x}) \geq -\frac{1}{\delta k} \delta + \frac{1}{k} = 0.$$

217 This finishes the proof that  $\mathbf{f}(\mathbf{x})$  is a probability distribution.

218 We are now ready to prove the two parts of Theorem 4.3.

219 **Proof of 1.** Without loss of generality we can again assume that  $\mathbf{x}$  satisfies (B.12) and we again fix  
 220  $k = k_{\mathbf{x}}$ . In this case the condition  $\|\mathbf{x}\|_{\infty} - x_i > \delta$  translates to  $i > k$ . Then by the definition of  $\mathbf{f}$   
 221 we have that

$$f_i(\mathbf{x}) = \mathbf{s}_i^T \mathbf{x} + u_{ki}$$

222 but by the definition of  $\mathbf{SM}_{(k,d)}$  we have that  $\mathbf{s}_i^T = \mathbf{0}^T$  and  $u_{ki} = 0$ . These two imply  $f_i(\mathbf{x}) = 0$ .

223 **Proof of 2.** Since  $\mathbf{f}$  is continuous and piecewise linear we can use Lemma B.2 and we get

$$\|\mathbf{f}(\mathbf{x}) - \mathbf{f}(\mathbf{y})\|_q \leq \left( \max_{\mathbf{A} \in \mathcal{A}_{\mathbf{f}}} \|\mathbf{A}\|_{p,q} \right) \cdot \|\mathbf{x} - \mathbf{y}\|_p \quad \forall \mathbf{x}, \mathbf{y} \in \mathbb{R}^d.$$

224 Now we have that the set  $\mathcal{A}_{\mathbf{f}}$  is the following

$$\mathcal{A}_{\mathbf{f}} = \left\{ \frac{1}{\delta} \mathbf{P}^T \mathbf{SM}_{(k,d)} \mathbf{P} \mid k \in \mathbb{N}, \mathbf{P} \text{ permutation matrix} \right\}$$

225 and since  $\mathbf{P}$  is a permutation matrix we have that

$$\left\| \mathbf{P}^T \mathbf{SM}_{(k,d)} \mathbf{P} \right\|_{p,q} = \left\| \mathbf{SM}_{(k,d)} \right\|_{p,q}$$

226 which implies

$$\|\mathbf{f}(\mathbf{x}) - \mathbf{f}(\mathbf{y})\|_q \leq \frac{1}{\delta} \left( \max_{k \in [d]} \left\| \mathbf{SM}_{(k,d)} \right\|_{p,q} \right) \cdot \|\mathbf{x} - \mathbf{y}\|_p \quad \forall \mathbf{x}, \mathbf{y} \in \mathbb{R}^d.$$

227 Finally using Lemma B.8 we have that

$$\|\mathbf{f}(\mathbf{x}) - \mathbf{f}(\mathbf{y})\|_q \leq \frac{2 \min \left\{ \frac{q}{q-1}, p+1, \log d \right\}}{\delta} \|\mathbf{x} - \mathbf{y}\|_p \quad \forall \mathbf{x}, \mathbf{y} \in \mathbb{R}^d.$$

228 This completes the proof of the theorem.

## 229 C Proofs of Lower Bounds in Section 4.2

230 In this section we provide the proofs of Theorem 4.4 and Theorem 4.5.

### 231 C.1 Proof of Theorem 4.4

232 We will show our proof of all the dimensions  $d$  of the form  $d = 2^{2k}$ ,  $k \in \mathbb{N}_+$ . Then we can deduce  
 233 that asymptotically our lower bound holds. We use an induction argument with base case  $d = 2$  and  
 234 inductive step from  $d$  to  $d^2$ .

235 **Induction Base,  $d = 2$ .** In this case we have that  $\mathbf{f}(\mathbf{x}) = (f_1(x_1, x_2), 1 - f_1(x_1, x_2))$  and for  
 236 simplicity we use the notation  $f$  to refer to  $f_1$ . We will prove that the  $\ell_{\infty}$  to  $\ell_1$  Lipschitz constant  
 237 of  $\mathbf{f}$  is at least  $1/\delta$  even in the restricted subregion where  $x_1 + x_2 = a$  for some  $a \in \mathbb{R}_+$ . In this  
 238 region the problem becomes single dimensional since  $\mathbf{f}(\mathbf{x}) = (f_1(x_1, a - x_1), 1 - f_1(x_1, a - x_1))$   
 239 and the only freedom of  $\mathbf{f}$  is to decide the single dimensional function  $f(x) = f_1(x, a - x)$ . The  
 240 approximation constraint implies that

$$\max\{x, a - x\} - xf(x) - (a - x)(1 - f(x)) \leq \delta \Leftrightarrow$$

241

$$\Leftrightarrow (a - 2x)f(x) \leq \delta - \max\{x, a - x\} + a - x.$$

242 The last inequality implies that there are two regions of  $[0, a] \times [0, 1]$  where  $(x, f(x))$  cannot be in.  
 243 The first is for  $x \leq a/2$  where  $(E_1) : f(x) \leq \delta/(a - 2x)$  and the second is for  $x > a/2$  where  
 244  $(E_2) : f(x) \geq 1 + \delta/(a - 2x)$ . Every  $f$  that satisfies the approximation conditions has to avoid  
 245 the regions  $(E_1)$  and  $(E_2)$ . Since we our goal is to minimize the Lipschitz constant of  $\mathbf{f}$  in this one  
 246 dimensional projection of  $\mathbf{f}$  we want to see what is the minimum  $df/dx$  that we can achieve while  
 247  $f$  avoids  $(E_1)$  and  $(E_2)$  and it is defined in the whole interval  $[0, a]$ . The forbidden regions  $(E_1)$  and  
 248  $(E_2)$  together with the optimal such  $f$  are shown in the next figure.

249 In it is not difficult to see that the any function  $f : [0, a] \rightarrow [0, 1]$  that avoids  $(E_1)$  and  $(E_2)$  has  
 250 to have at some point  $\xi \in [0, a]$  a slope  $f'(\xi)$  that is at least the slope of the green line in Figure 2

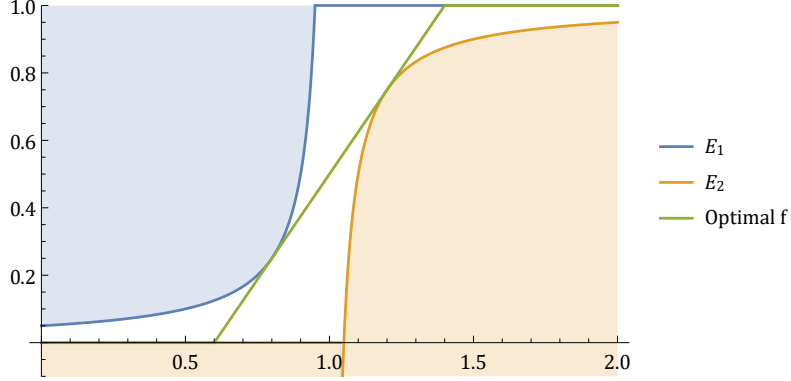

Figure 2: The forbidden regions ( $E_1$ ), ( $E_2$ ) and the optimal function  $f$  for  $a = 2$ ,  $\delta = 1/10$ .

251 which represents the line that is both tangent to the boundary of ( $E_1$ ) and to the boundary of ( $E_2$ ).  
 252 This target line can be computed in a closed form and its slope can be shown to be greater than  
 253  $1/8\delta$ . We leave the precise calculation as an exercise to the reader.

254 **Inductive Step, from  $d$  to  $d^2$ .** We assume by inductive hypothesis that for any soft maximum  
 255 function  $f$  in  $d$  dimensions, with Lipschitz constant at most  $\log(d)/8\delta$  has expected approximation  
 256 loss at least  $\delta$ . We will then prove that for any soft maximum function  $f$  in  $d^2$  dimensions with  
 257 Lipschitz constant at most  $\log(d)/8\delta$  has expected approximation loss at least  $2 \cdot \delta$ . This in turn  
 258 implies that if  $f$  has Lipschitz constant at most  $2 \log(d)/8\delta$  then  $f$  has expected approximation loss  
 259 at least  $\delta$ .

260 Consider any soft maximum function  $f : \mathbb{R}_+^{d^2} \rightarrow \Delta_{d^2-1}$  and let

$$\delta^* = \max_{z \in \mathbb{R}_+^{d^2}} \|z\|_\infty - \langle f(z), z \rangle.$$

261 We restrict our attention to a subspace of  $\mathbb{R}_+^{d^2}$  that is produced by  $(\mathbb{R}_+^d)^2$  by the following map  
 262  $g : (\mathbb{R}_+^d)^2 \rightarrow \mathbb{R}_+^{d^2}$  defined as

$$g_\ell(\mathbf{x}, \mathbf{y}) = x_{\ell \bmod d} + y_{\ell \operatorname{div} d}.$$

263 We also define

$$\hat{\delta} = \max_{\mathbf{x}, \mathbf{y} \in \mathbb{R}_+^d} \|g(\mathbf{x}, \mathbf{y})\|_\infty - \langle f(g(\mathbf{x}, \mathbf{y})), g(\mathbf{x}, \mathbf{y}) \rangle.$$

264 On these instances of  $\mathbb{R}_+^{d^2}$  we want to view the space of alternatives  $[d^2]$  as a product space  $[d] \otimes [d]$   
 265 and that's what the mapping  $g$  is capturing. We also want to view the output distribution as a product  
 266 distribution over  $[d] \otimes [d]$  but since we cannot assume independence we only define the marginal  
 267 distributions of  $f(z)$  to the coordinates  $\ell$  that have index with the same value  $\ell \bmod d$ , and the  
 268 coordinates  $\ell$  that have the same value  $\ell \operatorname{div} d$ . We will call  $q : \mathbb{R}_+^{d^2} \rightarrow \Delta_d$  the marginal distribution  
 269 to the coordinates  $\ell$  that have index with the same value  $\ell \operatorname{div} d$  and  $r : \mathbb{R}_+^{d^2} \rightarrow \Delta_d$  the marginal  
 270 distribution to the coordinates  $\ell$  that have the same value  $\ell \bmod d$ . More formally

$$q_i(z) = \sum_{j=1}^d f_{id+j}(z)$$

$$\text{and } r_j(z) = \sum_{i=1}^d f_{id+j}(z).$$

271 Now it is easy to observe that

$$\|g(\mathbf{x}, \mathbf{y})\|_\infty = \|\mathbf{x}\|_\infty + \|\mathbf{y}\|_\infty$$

$$\text{and } \langle f(g(\mathbf{x}, \mathbf{y})), g(\mathbf{x}, \mathbf{y}) \rangle = \langle q(g(\mathbf{x}, \mathbf{y})), \mathbf{x} \rangle + \langle r(g(\mathbf{x}, \mathbf{y})), \mathbf{y} \rangle.$$

272 Hence

$$\|g(x, y)\|_\infty - \langle f(g(x, y)), g(x, y) \rangle = \underbrace{\|x\|_\infty - \langle q(g(x, y)), x \rangle}_{\delta_1(x, y)} + \underbrace{\|y\|_\infty - \langle r(g(x, y)), y \rangle}_{\delta_2(x, y)}$$

273 We now define a continuous two game with the following players:

- 274 1. the first player picks a strategy  $x \in \mathbb{R}^d$  and has utility function equal to  $\delta_1(x, y)$ , and  
 275 2. the second player picks a strategy  $y \in \mathbb{R}^d$  and has utility function equal to  $\delta_2(x, y)$ .

276 It is easy to see that since  $f$  is Lipschitz continuous, both  $q$  and  $r$  are continuous and this implies  
 277 that  $\delta_1$  and  $\delta_2$  are continuous. It is well known then from the theory of continuous games that there  
 278 exists a mixed Nash Equilibrium in the game that we described above [33]. This means that there  
 279 exists a pair of distributions  $D_x, D_y$  in  $\mathbb{R}^d$  such that

- 280 1. for every  $x^*$  in the support of  $D_x$  it holds that  $x^* = \operatorname{argmax}_{x \in \mathbb{R}^d} \mathbb{E}_{y \sim D_y} [\delta_1(x, y)]$ , and  
 281 2. for every  $y^*$  in the support of  $D_y$  it holds that  $y^* = \operatorname{argmax}_{y \in \mathbb{R}^d} \mathbb{E}_{x \sim D_x} [\delta_2(x, y)]$ .

282 Let us now define the following functions

- 283 •  $\bar{q}(x) = \mathbb{E}_{y \sim D_y} [q(g(x, y))]$ ,  
 284 •  $\bar{r}(y) = \mathbb{E}_{x \sim D_x} [r(g(x, y))]$ ,  
 285 •  $\bar{\delta}_1(x) = \mathbb{E}_{y \sim D_y} [\delta_1(x, y)] = \|x\|_\infty - \langle \bar{q}(x), x \rangle$ , and  
 286 •  $\bar{\delta}_2(y) = \mathbb{E}_{x \sim D_x} [\delta_2(x, y)] = \|y\|_\infty - \langle \bar{r}(y), y \rangle$

287 where in the definition of the last two functions we have used the linearity of expectation. From the  
 288 existence of the Nash Equilibrium in the aforementioned continuous game we have that

$$\mathbb{E}_{x \sim D_x, y \sim D_y} [\delta_1(x, y) + \delta_2(x, y)] = \max_{x \in \mathbb{R}^d} \{\bar{\delta}_1(x)\} + \max_{y \in \mathbb{R}^d} \{\bar{\delta}_2(y)\}$$

289 which in turn implies the following

$$\max_{x, y \in \mathbb{R}^d} \{\delta_1(x, y) + \delta_2(x, y)\} \geq \max_{x \in \mathbb{R}^d} \{\bar{\delta}_1(x)\} + \max_{y \in \mathbb{R}^d} \{\bar{\delta}_2(y)\}. \quad (\text{C.1})$$

290 Next our goal is to relate the Lipschitzness of  $f$  with the Lipschitzness of  $\bar{q}$  and  $\bar{r}$ . Observe that

$$\|g(x, y) - g(x', y')\|_\infty = \|x - x'\|_\infty + \|y - y'\|_\infty \quad (\text{C.2})$$

$$\|q(g(x, y)) - q(g(x', y'))\|_1 \leq \|f(g(x, y)) - f(g(x', y'))\|_1 \quad (\text{C.3})$$

$$\|r(g(x, y)) - r(g(x', y'))\|_1 \leq \|f(g(x, y)) - f(g(x', y'))\|_1 \quad (\text{C.4})$$

291 where the first equality follows from simple calculations and the second and third inequality follow  
 292 from the known fact that the total variation distance of a distribution is lower bounded by the total  
 293 variation of its marginals.

294 Now we remind that we have assumed that  $f$  has  $(\ell_\infty, \ell_1)$ -Lipschitz constant that is at most  $L =$   
 295  $\log(d)/8\delta$ . Using the fact that the  $\ell_1$  norm is a convex function and using the Jensen inequality we  
 296 have that

$$\begin{aligned} \|\bar{q}(x) - \bar{q}(x')\|_1 &\leq \mathbb{E}_{y \sim D_y} [\|q(x, y) - q(x', y)\|_1] \\ &\leq \mathbb{E}_{y \sim D_y} [\|f(g(x, y)) - f(g(x', y))\|_1] \leq L \cdot \|x - x'\|_\infty \end{aligned} \quad (\text{C.5})$$

297 where the first inequality is due to Jensen, the second inequality follows from (C.3) and the last  
 298 inequality follows from the  $(\ell_\infty, \ell_1)$ -Lipschitz constant of  $f$  and (C.2). The same way we can prove  
 299 the following

$$\|\bar{r}(y) - \bar{r}(y')\|_1 \leq L \cdot \|y - y'\|_\infty. \quad (\text{C.6})$$

300 It hence follows that both  $\bar{q}$  and  $\bar{r}$  are softmax functions in  $d$  dimensions with Lipschitz constant at  
 301 most  $L = \log(d)/8\delta$ . Hence from our inductive hypothesis we have that the approximation error of  
 302 both  $\bar{q}, \bar{r}$  is at least  $\delta$ , of more formally

$$\max_{\mathbf{x} \in \mathbb{R}^d} \bar{\delta}_1(\mathbf{x}) \geq \delta \quad \text{and} \quad \max_{\mathbf{y} \in \mathbb{R}^d} \bar{\delta}_2(\mathbf{y}) \geq \delta.$$

303 Now putting the above inequalities together with (C.1) we get that the approximation error of  $\mathbf{f}$  is at  
 304 least  $2\delta$ . Formally  $\max_{\mathbf{x}, \mathbf{y} \in \mathbb{R}^d} \{\delta_1(\mathbf{x}, \mathbf{y}) + \delta_2(\mathbf{x}, \mathbf{y})\} \geq 2\delta$ . This concludes the inductive step and  
 305 proves our theorem.

## 306 C.2 Proof of Theorem 4.5

307 We set  $\mathbf{x} = (x, 0, \dots, 0)^T$  and  $\mathbf{y} = (y, 0, \dots, 0)^T$ , with  $y > x$ . Then we have

$$\text{EXP}(\mathbf{x}) = \left( \frac{e^{\alpha x}}{e^{\alpha x} + (d-1)}, \frac{1}{e^{\alpha x} + (d-1)}, \dots, \frac{1}{e^{\alpha x} + (d-1)} \right)^T$$

$$308 \quad \text{EXP}(\mathbf{y}) = \left( \frac{e^{\alpha y}}{e^{\alpha y} + (d-1)}, \frac{1}{e^{\alpha y} + (d-1)}, \dots, \frac{1}{e^{\alpha y} + (d-1)} \right)^T.$$

309 Since  $y > x$ , we compute

$$\begin{aligned} \|\text{EXP}(\mathbf{x}) - \text{EXP}(\mathbf{y})\|_1 &= \left( \frac{e^{\alpha y}}{e^{\alpha y} + (d-1)} - \frac{e^{\alpha x}}{e^{\alpha x} + (d-1)} \right) \\ &\quad - (d-1) \left( \frac{1}{e^{\alpha y} + (d-1)} - \frac{1}{e^{\alpha x} + (d-1)} \right) \end{aligned}$$

310 and  $\|\mathbf{x} - \mathbf{y}\|_p = y - x$ . Now let

$$h(z) = \frac{e^{\alpha z}}{e^{\alpha z} + (d-1)} - (d-1) \frac{1}{e^{\alpha z} + (d-1)} = \frac{e^{\alpha z} - (d-1)}{e^{\alpha z} + (d-1)}$$

311 our goal to maximize, with respect to  $x, y \in \mathbb{R}_+$  with  $y \geq x$ , the ratio

$$\frac{\|\text{EXP}(\mathbf{x}) - \text{EXP}(\mathbf{y})\|_1}{\|\mathbf{x} - \mathbf{y}\|_p} = \frac{h(y) - h(x)}{y - x}.$$

312 Because of the mean value theorem this is equivalent with maximum with respect to  $z \in \mathbb{R}_+$  the  
 313 derivative of  $h, h'(z)$ . But we have

$$h'(z) = \frac{\alpha e^{\alpha z} (e^{\alpha z} + (d-1)) - \alpha e^{\alpha z} (e^{\alpha z} - (d-1))}{(e^{\alpha z} + (d-1))^2} = 2\alpha \frac{e^{\alpha z} (d-1)}{(e^{\alpha z} + (d-1))^2}.$$

314 Now we set  $z = \frac{\log d}{\alpha}$  and we get for  $d > 10$

$$h' \left( \frac{\log d}{\alpha} \right) = 2\alpha \frac{d(d-1)}{(2d-1)^2} \leq \frac{\alpha}{2}.$$

315 Finally since the absolute approximation error of the exponential mechanism with parameter  $\alpha$  is  
 316  $\log d/\alpha$ , to get  $\delta$  absolute error we have to set  $\alpha = \log d/\delta$  and hence for this regime

$$c \geq \frac{\log d}{2\delta}$$

317 and the proof of the theorem is completed.

## 318 D Application to Mechanism Design

319 In this section we show how to design a digital auction with limited supply and worst case guaran-  
 320 tees. As we will see to do so we need to relax the incentive compatibility constraints to approximate  
 321 incentive compatibility in the framework as in [22]. In this setting we fix an anonymous price for

322 all the agents regardless of whether their values follow the same distribution of not. In this case we  
 323 show that we can extract almost the optimal revenue among all the fixed price auctions.

324 Compared to the results of [22] and [1] our mechanism can interpolate between both of the results.  
 325 Most importantly our results, in contrast to both [22] and [1] achieves a worst case guarantee instead  
 326 of a guarantee in expectation or with high probability. Another improvement of our result is that it  
 327 holds even if we do not assume unlimited supply but we only have finite supply of the item to sell.

328 We start with the next Section D.1 with the basic definitions and formulation of the mechanism and  
 329 auction design problem.

### 330 D.1 Definitions and Preliminaries

331 We first give some necessary basic definitions of design auctions for selling  $k$  identical items to  $n$   
 332 independent bidders with unit demand valuations.

333 **Items.** We have  $k$  identical items for sell.

334 **Bidders.** We have  $n$  independent bidders with unit demand valuations over the  $k$  item to sell. The  
 335 bidders are clustered in  $t$  classes and let  $t(i)$  be the class of bidder  $i$ . The value of bidder  $i \in [n]$   
 336 for any of the items is  $v_i \in [0, H]$  where  $H$  is the maximum possible value that we assume to be  
 337 known. We also assume that  $v_i$  it is drawn from a distribution  $\mathcal{F}_{t(i)}$ . We assume that all the random  
 338 variables  $v_i$  are independent from each other.

339 **Mechanism.** A mechanism  $M$  is a function  $M : \mathbb{R}_+^n \rightarrow \Delta_n^k \times \mathbb{R}_+^n$  that takes as input the bid  
 340 of the players and outputs  $k$  probability distributions  $\mathbf{A} = (\mathbf{a}_1, \dots, \mathbf{a}_k) \in \Delta_n^k$  over the bidders  
 341 that determines the probability that each bidder is going to receive the item  $j$ , together with a non-  
 342 negative value  $p_i$  for every bidder  $i$  that determines the money bidder  $i$  will pay. We write  $M(\mathbf{v}) =$   
 343  $(\mathbf{A}, \mathbf{p})$  and we call  $\mathbf{A} \in \Delta_n^k$  the allocation rule of the mechanism  $M$  and  $\mathbf{p}$  the payment rule of  $M$ .

344 **Bidders Utility.** We assume that the bidders are unit-demand and they have quasi-linear utility, i.e.  
 345 that the utility function  $u_i : \Delta_n \times \mathbb{R}_+^n \rightarrow \mathbb{R}$  of each bidder is equal to  $u_i(\mathbf{A}, \mathbf{p}) = \max_j (a_{ij} v_i) - p_i$ .

346 **Revenue Objective.** For every mechanism  $M$  the revenue  $\text{REV}(M, \mathbf{v})$  the designer gets in input  $\mathbf{v}$   
 347 is equal to  $\text{REV}(M, \mathbf{v}) = \sum_{i \in [n]} p_i$  where  $\mathbf{p}$  is the vector of prices that the mechanism  $M$  assigns  
 348 to the agents in input  $\mathbf{v}$ . By  $\text{REV}(M)$  we denote the expected value of the mechanism  $M$  when the  
 349 values  $\mathbf{v}$  are drawn from their distributions, i.e.  $\text{REV}(M) = \mathbb{E}[\text{REV}(M, \mathbf{v})]$ .

350 **Incentive Compatibility.** A mechanism  $M$  is called *dominant strategy incentive compatible* (DSIC)  
 351 or simply *incentive compatible* (IC) if the bidders cannot increase their revenue by misreporting their  
 352 bids. More precisely we say that  $M$  satisfies incentive compatibility if for every bidder  $i$

$$u_i(M(v_i, \mathbf{v}_{-i})) \geq u_i(M(v'_i, \mathbf{v}_{-i})) \quad \forall v_i, v'_i, \mathbf{v}_{-i}. \quad (\text{D.1})$$

353 Also we say that  $M$  is  $\varepsilon$ -incentive compatible if for every bidder  $i$

$$u_i(M(v_i, \mathbf{v}_{-i})) \geq \cdot u_i(M(v'_i, \mathbf{v}_{-i})) - \varepsilon \quad \forall v_i, v'_i, \mathbf{v}_{-i}. \quad (\text{D.2})$$

354 **Individual Rationality.** We say that a mechanism  $M$  satisfies individual rationality if for every  
 355 bidder  $i$   $u_i(M(\mathbf{v})) \geq 0$  for all  $\mathbf{v} \in \mathbb{R}_+^n$ .

356 **Optimal Revenue over a Ground Set.** Let  $\mathcal{M} = \{M_1, \dots, M_d\}$  be a set of mechanisms which  
 357 we call *ground set*, we define the maximum revenue of  $\mathcal{M}$  at input  $\mathbf{v}$  as  $\text{OPTREV}(\mathcal{M}, \mathbf{v}) =$   
 358  $\max_{M \in \mathcal{M}} \text{REV}(M, \mathbf{v})$ . Also we define maximum expected revenue achievable by any mechanism  
 359 in  $\mathcal{M}$  to be  $\text{OPTREV}(\mathcal{M}) = \max_{M \in \mathcal{M}} \text{REV}(M)$ .

360 The mechanisms that we describe in this section involve a smooth selection of a mechanism among  
 361 the mechanisms in a carefully chosen ground set of incentive compatible and individual rational  
 362 mechanisms  $\mathcal{M}$ .

363 **Soft Maximizer Mechanism.** Let  $\mathcal{M} = \{M_1, \dots, M_d\}$  be a ground set of incentive compatible  
 364 and individually rational mechanism. We define the mechanism  $Q[\mathcal{M}, \mathbf{f}]$  to be the mechanism that  
 365 chooses one of the mechanisms in  $[d]$  randomly from the probability distribution that output the soft  
 366 maximum function  $\mathbf{f}$  with input the vector  $\mathbf{x} = (\text{REV}(M_1, \mathbf{v}), \dots, \text{REV}(M_d, \mathbf{v}))$ .

367 The following lemma proves the incentive compatibility properties of the mechanism  $Q[\mathcal{M}, \mathbf{f}]$  when  
 368 the  $\mathbf{f}$  satisfies some stability properties. For a proof of this lemma we refer to the proof of Lemma  
 369 3 in McSherry and Talwar [22].

370 **Lemma D.1.** *Let the bidders valuations come from the interval  $[0, H]$ , let also  $\mathcal{M} = \{M_1, \dots, M_d\}$   
 371 be a ground set of incentive compatible and individually rational mechanism and  $\mathbf{f}$  be a soft max-  
 372 imum function that is  $(\ell_p, \ell_1)$ -Lipschitz with Lipschitz constant  $L = \varepsilon/S_\chi(\text{REV})$ . Then the mecha-  
 373 nism  $Q[\mathcal{M}, \mathbf{f}]$  is individually rational and  $\varepsilon$ -incentive compatible.*

## 374 D.2 Selling Digital Goods with Anonymous Price

375 The single parameter auctions are arguably the most classical setting in the mechanism design lit-  
 376 erature. Myerson, in his seminal work [27], proved that among all the possible auction designs  
 377 the revenue is maximized by a second price auction with reserve price. The basic assumptions of  
 378 his framework though is the assumption that the auctioneer has a prior belief for the values of the  
 379 different bidders and she tries to maximize her expected revenue in this Bayesian setting. This as-  
 380 sumption is the major milestone in applying the Myerson's auction in practice. Trying to relax this  
 381 assumption, a line of theoretical computer science work studied the maximization of revenue when  
 382 we only have access to samples that come from the bidders distribution and not access to the entire  
 383 distribution [29, 9, 6, 25, 8, 5]. Although these works make a very good progress on understanding  
 384 the optimal auctions and make them more practical there are still some drawbacks that make these  
 385 auctions not applicable in practice.

- 386 1. **Buyers may strategize in the collection of samples.** If the buyers know that the seller is  
 387 going to collect samples to estimate the optimal auction to run then they have incentives to  
 388 strategize so that the seller chooses lower prices and hence they get more utility.
- 389 2. **Constant approximation is not always a satisfying guarantee.** The constant approxima-  
 390 tion is a worst case guarantee and hence the constant approximation mechanisms might fail  
 391 to get almost optimal revenue even in the instances where this is easy. A popular alternative  
 392 in practical applications of mechanism design is to choose the optimal from a set of simple  
 393 mechanisms.

394 Because of these reasons, 1. and 2., the implementation and the theoretical guarantees of the mech-  
 395 anism  $Q[\mathcal{M}, \mathbf{f}]$  becomes a relevant problem. The ground set of mechanisms that we consider in this  
 396 section is a subset of the second price selling separately auctions with a single reserved price, which  
 397 we call set of anonymous auctions and we denote by  $\mathcal{M}_A$ . We are now ready to prove the main  
 398 result of this section.

399 **Theorem D.2.** *Consider a  $k$  identical item auction instance with unit demand bidder's and values  
 400 in the range  $[0, H]$ . Then there exists a ground set of mechanisms  $\hat{\mathcal{M}} \subseteq \mathcal{M}_A$  such that for all  
 401  $\mathbf{v} \in [0, H]^n$  and for any of the possible outputs of  $Q[\hat{\mathcal{M}}, \text{PLSOFTMAX}^\eta]$  with input  $\mathbf{v}$  it holds that*

$$\text{REV}(Q[\hat{\mathcal{M}}, \text{PLSOFTMAX}^\eta], \mathbf{v}) \geq (1 - \delta)\text{OPTREV}(\mathcal{M}_A, \mathbf{v}) - 4 \left( \frac{1}{\delta} - 1 \right) \frac{H}{\varepsilon}$$

402 where  $\text{PLSOFTMAX}^\eta$  is the soft maximum function defined in (4.1) with parameter such that  
 403  $\text{PLSOFTMAX}$  is  $\varepsilon$ -Lipschitz in Total Variation Distance. Moreover  $Q[\hat{\mathcal{M}}, \text{PLSOFTMAX}]$  is indi-  
 404 vidually rational and  $\varepsilon \cdot H$ -incentive compatible.

405 *Proof.* Let  $[0, H]$  be the range of prices for the single item auction. We fix a positive real number  $\delta$   
 406 and we use the discretization  $\mathcal{P}$  of  $[0, H]$ , where  $\mathcal{P} = \{p_1, \dots, p_d\}$  and  $p_i = H \cdot (1 - \delta)^i$ . Let also  
 407  $\alpha = p_d$ . We are now ready to define the ground set of mechanisms  $\hat{\mathcal{M}} = \{M_1, \dots, M_d\}$  where  $M_i$   
 408 is the second price auction with reserved price equal to  $p_i$ . The size of  $\hat{\mathcal{M}}$  is

$$d = \log \left( \frac{\alpha}{H} \right) / \log(1 - \delta) \leq 2 \log \left( \frac{H}{\alpha} \right) / \delta$$

409 where the last inequality follows assuming that  $\delta \leq 1/2$ . As we described, we will run our  
 410 mechanism  $\text{PLSOFTMAX}$ , with objective function  $\text{REV}$ . In order to be able to apply our main



411 theorem about the PLSOFTMAX mechanism we will bound the  $\ell_1$ -sensitivity of the vector  $\mathbf{x} =$   
 412  $(\text{REV}(M_1, \mathbf{v}), \dots, \text{REV}(M_d, \mathbf{v}))$  with respect the change of the bid of one agent. Hence we need to  
 413 bound the quantity

$$\sum_{i=1}^d |\text{REV}(M_i, (v_i, \mathbf{v}_{-i})) - \text{REV}(M_i, (v'_i, \mathbf{v}_{-i}))| \leq (1 - \delta) \frac{H}{\delta}.$$

414 This inequality holds because for every agent  $i$  the total change that agent  $i$  can make in the revenue  
 415 objective of all the alternatives is at most

$$\sum_{i=1}^d (1 - \delta)^i H \leq \left( \frac{1}{\delta} - 1 \right) H,$$

416 which implies that for our setting  $S_1(\text{REV}) \leq \left( \frac{1}{\delta} - 1 \right) H$ .

417 The approximation loss of our mechanism has three components: (1) we loose  $\delta \text{OPT}$  because of the  
 418 discretization of the price of every item, (2) we loose  $\alpha$  from every item because we need the ground  
 419 set to be finite and (3) we loose  $\eta$  because we use the soft maximization algorithm PLSOFTMAX <sup>$\eta$</sup> .  
 420 For the last part and since we need PLSOFTMAX <sup>$\eta$</sup>  to be  $\varepsilon$ -Lipschitz in total variation distance we  
 421 have that

$$\varepsilon = \frac{4}{\eta} S_1(\text{REV}) \leq \frac{4}{\eta} \left( \frac{1}{\delta} - 1 \right) H \implies \eta \leq \frac{4}{\varepsilon} \left( \frac{1}{\delta} - 1 \right) H.$$

422 Finally applying Theorem 4.3 the theorem follows.  $\square$

423 If we assume that  $H = O(1)$  then by setting  $\delta \leftarrow \frac{1}{\sqrt{\text{OPT}}}$  and  $\varepsilon \leftarrow \varepsilon \cdot H$  we recover the result of [1],  
 424 with relaxed incentive compatibility, but even in the case of limited supply and having a worst case  
 425 guarantee.

426 **Corollary D.3.** *Consider a  $k$  identical item auction instance with unit demand bidder's and values*  
 427 *in the range  $[0, H]$ . If we fix  $H$  then there exists a mechanism  $M$  such that for any  $\mathbf{v} \in [0, H]^n$ , for*  
 428 *all  $\mathbf{v} \in [0, H]^n$  and for any of the possible outputs of  $M$  with input  $\mathbf{v}$  it holds that*

$$\text{REV}(M, \mathbf{v}) \geq \text{OPTREV}(\mathcal{M}_A) - O\left(\frac{1}{\varepsilon} \sqrt{\text{OPTREV}(\mathcal{M}_A)}\right)$$

429 where  $M$  is individually rational and  $\varepsilon$ -incentive compatible.

430 Another corollary can be directly derived by applying a discretized version of the Theorem 9 of [22]  
 431 but replacing the exponential mechanism with the PLSOFTMAX mechanism. Then as we explained  
 432 in Section 4 the guarantees will hold in the worst case and not in expectation.

433 **Corollary D.4.** *Consider a  $k$  identical item auction instance with unit demand bidder's and values*  
 434 *in the range  $[0, H]$ . If we fix  $H$  then there exists a mechanism  $M$  such that for any  $\mathbf{v} \in [0, H]^n$ , for*  
 435 *all  $\mathbf{v} \in [0, H]^n$  and for any of the possible outputs of  $M$  with input  $\mathbf{v}$  it holds that*

$$\text{REV}(M, \mathbf{v}) \geq \text{OPTREV}(\mathcal{M}_A) - O\left(\frac{1}{\varepsilon} \log(\text{OPTREV}(\mathcal{M}_A) \cdot k)\right)$$

436 where  $M$  is individually rational and  $\varepsilon$ -incentive compatible.

437 As we can see Corollary D.3 and Corollary D.4 are not directly comparable since in Corollary D.4  
 438 the  $\log(k)$  factor in the approximation error appears that misses from Corollary D.3.

## 439 E Maximization of Submodular Functions

440 In this section we consider the problem of differentially privately maximizing a submodular function,  
 441 under cardinality constraints. For this problem we apply the power mechanism and we compare our  
 442 results with the state of the art work of Mitrovic et al. [24]. We observe that when the input data set  
 443 is only  $O(1)$ -multiplicative insensitive power mechanism has an error that is asymptotically smaller  
 444 than the corresponding error from the state of the art algorithm of Mitrovic et al. [24]. This result is  
 445 formally stated in Corollary 6.6.

446 As discussed in Section 6.2.1, to solve the submodular maximization under cardinality constraints  
 447 we use the Algorithm 1 of [24], where we replace the exponential mechanism in the soft maximiza-  
 448 tion step with the power mechanism.

449 **Algorithm 1** (Algorithm 1 of [24]):

450 **Input:** submodular function  $h$ , soft maximization function  $g$ ,  $k \in \mathbb{N}$ .

451 **Output:**  $S \subseteq \mathcal{D}$  such that  $|S| = k$ .

- 452 1. Initialize  $S_o = \emptyset$ . Let  $|\mathcal{D}| = d$  and  $\mathcal{D} = \{v_1, \dots, v_d\}$ .
- 453 2. For  $i \in [k]$ :
  - 454 a. Define  $q_i : \mathcal{D} \setminus S_{i-1} \rightarrow \mathbb{R}$  as
 
$$q_i(v) = h(S_{i-1} \cup \{v\}) - f(S_{i-1}).$$
  - 455 b. Pick  $u_i \in \mathcal{D}$  from the probability distribution
 
$$g(q_i(v_1), \dots, q_i(v_d)).$$
  - 456 c.  $S_i \leftarrow S_{i-1} \cup \{u_i\}$ .
- 457 3. Return  $S_k$ .

458 To analyze Algorithm 1 we need the following result for compositions of differentially private algo-  
 459 rithms.

460 **Composition of Differentially Private Algorithms.** An algorithm  $A$  is a composition of  $k$  algo-  
 461 rithms  $A_1, \dots, A_k$  if the output of  $A(\mathbf{v})$  is a function only of the outputs  $A_1(\mathbf{v}), \dots, A_k(\mathbf{v})$ .

462 The following theorem bounds the privacy of  $A(\mathbf{v})$  as a function of the privacy of  $A_1(\mathbf{v}), \dots, A_k(\mathbf{v})$ .

463 **Theorem E.1** ([12]). *Let  $A_1, \dots, A_k$  be differentially private algorithms with parameters  $(\varepsilon', \delta')$ .  
 464 Let also  $A$  a composition of  $A_1, \dots, A_k$ . Then,  $A$  satisfies  $(\varepsilon, \delta)$ -differential privacy with*

- 465 1.  $\varepsilon = k\varepsilon'$  and  $\delta = k\delta'$ ,
- 466 2.  $\varepsilon = \frac{1}{2}k^2\varepsilon'^2 + \sqrt{2 \log(1/\eta)}\varepsilon'$  and  $\delta = \eta + k\delta'$  for any  $\eta > 0$ .

467 We are now ready to prove Theorem 6.4.

468 *Proof of Theorem 6.4.* The privacy guarantee easily follows from the composition properties of dif-  
 469 ferentially private mechanisms that we present in Theorem E.1.

470 Let  $S^*$  be the set of the optimal solution,  $S_i$  be the set that the algorithm has in the  $i$ th iteration and  
 471  $v_i$  the  $i$ th element that our algorithm chose. We have that

$$\begin{aligned} \mathbb{E}[h(S_i \cup \{v_i\}) - h(S_i)] &= \\ &= \frac{1}{1 + \delta} \max_{v \in \mathcal{D} \setminus S_{i-1}} (h(S_i \cup \{v\}) - h(S_i)) \\ &\geq \frac{1}{1 + \delta} \frac{1}{k} \left( \sum_{v \in S^*} (h(S_i \cup \{v\}) - h(S_i)) \right) \\ &\geq \frac{1}{1 + \delta} \frac{1}{k} (h(S^* \cup S_{i-1}) - h(S_{i-1})) \\ &\geq \frac{1}{1 + \delta} \frac{1}{k} (\text{OPT} - h(S_{i-1})). \end{aligned}$$

472 Therefore

$$\text{OPT} - \mathbb{E}[h(S_i)] \leq \left(1 - \frac{1}{1 + \delta} \frac{1}{k}\right)^i \text{OPT}.$$

473 From which we conclude

$$\begin{aligned} \mathbb{E}[h(S_k)] &\geq \left(1 - \left(1 - \frac{1}{1 + \delta} \frac{1}{k}\right)^k\right) \text{OPT} \\ &\geq \left(1 - \frac{1}{\exp(1/(1 + \delta))}\right) \text{OPT}. \end{aligned}$$

474 and hence the theorem follows.  $\square$

475 Next our goal is to compare Theorem 8 of [24] with Theorem 6.4. We illustrate the difference be-  
 476 tween power and exponential mechanism showing an improvement over the state of the art algorithm  
 477 of [24].

478 **Lemma E.2.** *Let  $\delta_{\text{POW}}$  be the approximation loss of POW assuming that the input data set is  $t$ -  
 479 multiplicative insensitive, then  $\delta_{\text{POW}} \leq \min \left\{ \frac{1}{e} + \frac{2\sqrt{k} \log d}{t\varepsilon} \frac{S_{\infty}(h)}{\text{OPT}}, 1 \right\}$ .*

480 *Proof.* From Theorem 6.4 we have that

$$\begin{aligned} \delta_{\text{POW}} &= \min \left\{ \exp \left( - \left( 1 - \frac{S_{\infty}(h)}{\text{OPT}} \right)^{\frac{2\sqrt{k} \log d}{\varepsilon}} \right), 1 \right\} \\ &\leq \min \left\{ \exp \left( - \left( 1 - \frac{2\sqrt{k} \log d}{\varepsilon} \frac{S_{\infty}(h)}{\text{OPT}} \right) \right), 1 \right\} \\ &= \frac{1}{e} \min \left\{ \exp \left( \frac{2\sqrt{k} \log d}{\varepsilon} \frac{S_{\infty}(h)}{\text{OPT}} \right), e \right\} \end{aligned}$$

481 Now if  $\frac{2\sqrt{k} \log d}{\varepsilon} \frac{S_{\infty}(h)}{\text{OPT}} \geq 1$  then  $\delta_{\text{POW}} = 1$  and hence, we can assume that  $\frac{2\sqrt{k} \log d}{\varepsilon} \frac{S_{\infty}(h)}{\text{OPT}} \leq 1$ . But  
 482 for any  $z \leq 1$  it is easy to see that  $e^z \leq 1 + ez$  and hence

$$\delta_{\text{POW}} \leq \frac{1}{e} \min \left\{ 1 + e \frac{2\sqrt{k} \log d}{\varepsilon} \frac{S_{\infty}(h)}{\text{OPT}}, e \right\}$$

483 and the lemma follows.  $\square$

484 Now combining Theorem 6.4 and Lemma E.2 we can prove Corollary 6.6 which clearly illustrates  
 485 the comparison of the performance of power and exponential mechanism. From Corollary 6.6 we  
 486 observe that the approximation loss using the exponential mechanism is a  $O(\sqrt{k})$  factor larger than  
 487 the approximation loss using the power mechanism. Hence Corollary 6.6 improves over the state of  
 488 the art differentially private algorithms for submodular optimization.

489 We can use the same ideas as in Theorem 6.4 and Corollary 6.6 to improve the results for maximiza-  
 490 tion of submodular functions with more general matroid constraints of [24].

## 491 F Experiments on Large Real-World Data Sets

492 *Remark.* *In the main part we accidentally refer to Appendix F both for the theoretical and the*  
 493 *practical results about differentially private submodular maximization. Please look at the Appendix*  
 494 *E for the details on the theoretical part and in this section for the details in the experiments part.*

495 We now empirically validate our results for submodular maximization. In our experiments we used  
 496 a publicly available data-set to create a max- $k$ -coverage instance similarly to prior work [13]. In a  
 497 coverage instance we are given a family  $N$  of sets over a ground set  $U$  and we want to find  $k$  sets  
 498 from  $N$  with maximum size of their union (which is a monotone submodular maximization prob-  
 499 lem under cardinality constraint). We created the coverage instance from the **DBLP co-authorship**  
 500 network of computer scientists by extracting, for each author, the set of her coauthors. The ground  
 501 set is the set of all authors in DBLP. There are  $\sim 300$  thousands sets over  $\sim 300$  thousands elements  
 502 for a total sum of sizes of all sets of 1.0 million. Then we ran the (non-private) greedy submodular  
 503 maximization algorithm to obtain a (baseline) upperbound on the solution (notice that computing  
 504 the actual optimum is NP-Hard). Then we compared the objective value obtained by private greedy  
 505 algorithm for submodular maximization using the exponential mechanism (as described in Algo-  
 506 rithm 1 in [24]) and using the power mechanism as soft-max, for different values of the parameter  $\alpha$   
 507 in the two methods. We used  $k = 10$  as the cardinality of the output in our experiment.

508 To evaluate empirically the smoothness of the mechanism we performed a manipulation test on the  
 509 data. We manipulated the coverage instance removing, independently, each element of the ground

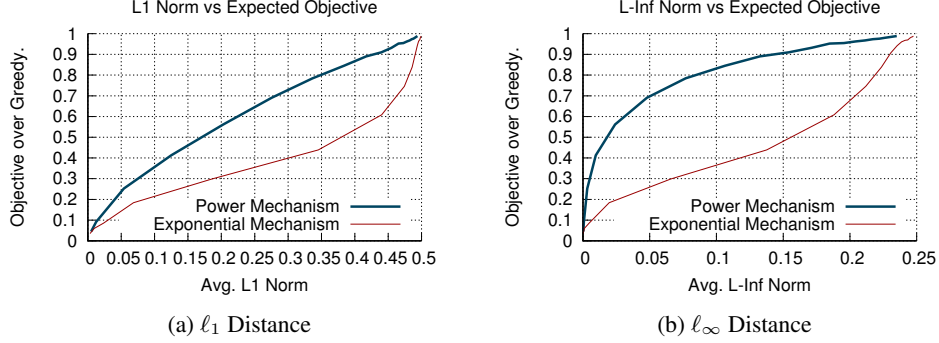

Figure 3: Robustness vs objective value in the submodular maximization with cardinality constraint  $k = 10$ . The y-axis shows the ration of the average objective obtained vs the (non-private) greedy algorithm. The x-axis represent the sensitivity to the manipulation test of the value of the first element selected.

510 set with probability  $1/1000$ . Then, for a fixed mechanism and parameter setting, we compared  
 511 the probability distribution of the first set selected by the algorithm in the manipulated instance  
 512 vs in the original instance (we used the  $\ell_1$  and  $\ell_\infty$  distance of the distributions)<sup>2</sup>. Finally, we ran  
 513 each configuration of the experiment (i.e., a mechanism and a parameter) 100 times and reported  
 514 the average objective in the original dataset (over the objective of non-private greedy) and average  
 515 distance between the distributions obtained over the original and manipulated datasets. Figures 3a  
 516 and 3b report the results for  $k = 10$  in the DBLP instance. Notice that we observe that for the  
 517 same level of sensitivity to manipulation (both in  $\ell_1$  and  $\ell_\infty$  norm) the power mechanism obtains  
 518 significantly more objective value in this problem as well (y-axis reports the average ratio of the  
 519 objective obtained vs that of the non-private algorithm). This confirms our theoretical results for  
 520 submodular maximization.

## 521 G Loss Function For Multi-class Classification

522 Before presenting our loss function that can be used for multi-class classification we present a proof  
 523 of Lemma 6.7. Due to a minor typo in the presentation of the Lemma in the main part of the paper  
 524 we restate the Lemma here corrected.

525 **Lemma G.1** (Lemma 6.7). *Let  $h(\cdot) = \text{sparsegen-lin}(\cdot)$  be the generalization of  $\text{sparsemax}(\cdot)$   
 526 function, then there exist  $\mathbf{x}, \mathbf{y} \in \mathbb{R}^d$  such that  $\|h(\mathbf{x}) - h(\mathbf{y})\|_1 \geq \frac{1}{2}d^{1-1/q} \|\mathbf{x} - \mathbf{y}\|_q$ .*

527 *Proof of Lemma 6.7.* We set  $\mathbf{x} = \mathbf{0}$  and  $\mathbf{y}$  such that  $y_i = 2/d$  for  $i \leq d/2$  and  $y_i = 0$  otherwise.  
 528 Doing simple calculations we get that  $h(\mathbf{x}) = (1/d) \cdot \mathbf{1}$ , whereas  $h_i(\mathbf{y}) = 2/d$  for  $i \leq d/2$  and  
 529  $h_i(\mathbf{y}) = 0$  otherwise. Hence we have  $\|h(\mathbf{x}) - h(\mathbf{y})\|_1 = 1$  and

$$\|\mathbf{x} - \mathbf{y}\|_q = (2/d)^{1-1/q} \leq 2/d^{1-1/q}$$

530 and the lemma follows. □

531 In this section, we show how our mechanism can be used in multi-class classification by proposing  
 532 the corresponding loss function.

533 First, we note that the  $\mathcal{L}_{\text{sparsegen-lin,hinge}}$  loss function defined in [21] can be used as a loss function  
 534 for any soft-max function that satisfies: (1) permutation invariance, (2)  $\delta$ -worst-case approximation  
 535 additive loss, where we have to set  $\delta = 1 - \lambda$ . The main issue of this loss function is that it does  
 536 not take into account specific structural properties of the softmax function used. For this reason, we  
 537 propose an alternative loss function.

<sup>2</sup>Ideally one would like to compare the distribution of the output value of the algorithm for the actual  $k$ . However, computing or even approximating well the distribution of value of the output is computationally hard, so we resort to computing exactly the distribution of the first item selected.

538 A loss function that corresponds to PLSOFTMAX with parameter  $\delta$  is a function  $L : \mathbb{R}^d \times \Delta_d \rightarrow \mathbb{R}_+$   
539 such that for any  $\mathbf{x} \in \mathbb{R}^d$  and  $\mathbf{q} \in \Delta_d$ , it holds that  $L(\mathbf{x}; \mathbf{q}) = 0 \Leftrightarrow \text{PLSOFTMAX}^\delta(\mathbf{x}) = \mathbf{q}$ . Our  
540 loss function has three components: (1)  $L_{ord}$  is minimized only when the ordering of  $\mathbf{x}$  is the same  
541 as the ordering of  $\mathbf{q}$ , (2)  $L_{supp}$  is minimized when the coordinates of  $\mathbf{x}$  that are within  $\delta$  from  
542  $\|\mathbf{x}\|_\infty$  correspond to the coordinates  $i$  such that  $q_i > 0$ , and (3)  $L_{sqr}$  minimizes the error between  
543  $\text{PLSOFTMAX}^\delta(\mathbf{x})$  and  $\mathbf{q}$  assuming they have the same order. Finally, our loss function  $L_{\text{PLSOFTMAX}}$   
544 is the sum of these three components, i.e.  $L_{\text{PLSOFTMAX}} = L_{ord} + L_{supp} + L_{sqr}$ .

545 **Order Regularization.** For every  $\mathbf{q} \in \Delta_d$ , let  $\pi_{\mathbf{q}}$  be the permutation of the coordinates  $[d]$  such that  
546  $q_{\pi_{\mathbf{q}}(1)} \geq \dots \geq q_{\pi_{\mathbf{q}}(d)}$ , then

$$L_{ord}(\mathbf{x}; \mathbf{q}) = \sum_{i=1}^{d-1} \max\{x_{\pi_{\mathbf{q}}(i+1)} - x_{\pi_{\mathbf{q}}(i)}, 0\}.$$

547 **Support Regularization.** Let  $\mathbf{q} \in \Delta_d$ , let  $S \subseteq [d]$  be the subset of the coordinates  $[d]$  such that  
548  $i \in S \Leftrightarrow q_i > 0$ , let also  $\delta$  be the parameter of PLSOFTMAX, then

$$L_{supp}(\mathbf{x}; \mathbf{q}) = \sum_{i \in S} \max\{x_{\pi_{\mathbf{q}}(1)} - x_i - \delta, 0\} + \sum_{i \in [d] \setminus S} \max\{x_i - x_{\pi_{\mathbf{q}}(1)} + \delta, 0\}.$$

549 **Square Loss.** Let  $\mathbf{q} \in \Delta_{d-1}$ , then

$$L_{sqr}(\mathbf{x}; \mathbf{q}) = \left\| \mathbf{q} - \frac{1}{\delta} \mathbf{P}_{\pi_{\mathbf{q}}}^{-1} \mathbf{S} \mathbf{M}_{(k_{\mathbf{q}}, d)} \mathbf{P}_{\pi_{\mathbf{q}}} \mathbf{x} - \mathbf{P}_{\pi_{\mathbf{q}}}^{-1} \mathbf{u}^{(k_{\mathbf{q}})} \right\|_2^2.$$

550 The main properties of the loss function  $L_{\text{PLSOFTMAX}}$  are summarized in Proposition 6.8. This propo-  
551 sition suggests that  $L_{\text{PLSOFTMAX}}$  can be used as a meaningful loss function in multiclass classification.

552 *Proof of Proposition 6.8.* The property (1) follows directly from the fact that  $L_{\text{PLSOFTMAX}}$  is a sum  
553 of non-negative terms. Also observe that: (i)  $L_{ord} = 0$  if and only if the order of the coordinates  
554 of the vector  $\mathbf{x}$  agrees with the order of the coordinates of  $\mathbf{q}$ , and (ii)  $L_{supp} = 0$  if and only if the  
555 only coordinates that are  $\delta$ -close to  $\|\mathbf{x}\|_\infty$  are the coordinates for which  $q_i > 0$ . Using (i) and (ii)  
556 together with  $L_{sqr} = 0$  we can see that the property (2) of Proposition 6.8 is implied. Property (3)  
557 follows again easily from the fact that the maximum of two convex function is convex and the sum  
558 of convex functions is also convex.  $\square$

## 559 References

- 560 [1] M-F Balcan, Avrim Blum, Jason D Hartline, and Yishay Mansour. Mechanism design via  
561 machine learning. In *Foundations of Computer Science, 2005. FOCS 2005. 46th Annual IEEE  
562 Symposium on*, pages 605–614. IEEE, 2005.
- 563 [2] Ludwig Boltzmann. Studien uber das gleichgewicht der lebenden kraft. *Wissenschaftliche  
564 Abhandlungen*, 1:49–96, 1868.
- 565 [3] John S. Bridle. Probabilistic interpretation of feedforward classification network outputs,  
566 with relationships to statistical pattern recognition. In Françoise Fogelman Soulié and Jeanny  
567 Hérault, editors, *Neurocomputing*, pages 227–236, Berlin, Heidelberg, 1990. Springer Berlin  
568 Heidelberg.
- 569 [4] John S. Bridle. Training stochastic model recognition algorithms as networks can lead to  
570 maximum mutual information estimation of parameters. In D. S. Touretzky, editor, *Advances  
571 in Neural Information Processing Systems 2*, pages 211–217, 1990.
- 572 [5] Yang Cai and Constantinos Daskalakis. Learning multi-item auctions with (or without) sam-  
573 ples. *arXiv preprint arXiv:1709.00228*, 2017.
- 574 [6] Richard Cole and Tim Roughgarden. The sample complexity of revenue maximization. In  
575 *Proceedings of the forty-sixth annual ACM symposium on Theory of computing*, pages 243–  
576 252. ACM, 2014.

- 577 [7] Alexandre de Brébisson and Pascal Vincent. An exploration of softmax alternatives belonging  
578 to the spherical loss family. *arXiv preprint arXiv:1511.05042*, 2015.
- 579 [8] Nikhil R Devanur, Zhiyi Huang, and Christos-Alexandros Psomas. The sample complexity of  
580 auctions with side information. In *Proceedings of the forty-eighth annual ACM symposium on*  
581 *Theory of Computing*, pages 426–439. ACM, 2016.
- 582 [9] Peerapong Dhangwatnotai, Tim Roughgarden, and Qiqi Yan. Revenue maximization with a  
583 single sample. *Games and Economic Behavior*, 91:318–333, 2015.
- 584 [10] Konstantinos Drakakis and BA Pearlmutter. On the calculation of the  $l_2 \rightarrow l_1$  induced matrix  
585 norm. *International Journal of Algebra*, 3(5):231–240, 2009.
- 586 [11] Cynthia Dwork and Aaron Roth. The algorithmic foundations of differential privacy. *Founda-*  
587 *tions and Trends® in Theoretical Computer Science*, 9(3–4):211–407, 2014.
- 588 [12] Cynthia Dwork, Guy N Rothblum, and Salil Vadhan. Boosting and differential privacy. In  
589 *2010 IEEE 51st Annual Symposium on Foundations of Computer Science*, pages 51–60. IEEE,  
590 2010.
- 591 [13] Alessandro Epasto, Vahab Mirrokni, and Morteza Zadimoghaddam. Bicriteria distributed sub-  
592 modular maximization in a few rounds. In *SPAA*. ACM, 2017.
- 593 [14] J.W. Gibbs. *Elementary Principles in Statistical Mechanics: Developed with Especial Refer-*  
594 *ence to the Rational Foundations of Thermodynamics*. C. Scribner’s sons, 1902.
- 595 [15] Ian Goodfellow, Yoshua Bengio, and Aaron Courville. *Deep Learning*. MIT Press, 2016.
- 596 [16] Julien M Hendrickx and Alex Olshevsky. Matrix  $p$ -norms are  $np$ -hard to approximate if  $p \neq$   
597  $1, 2, \infty$ . *SIAM Journal on Matrix Analysis and Applications*, 31(5):2802–2812, 2010.
- 598 [17] Zhiyi Huang and Sampath Kannan. The exponential mechanism for social welfare: Private,  
599 truthful, and nearly optimal. In *Proceedings of the 2012 IEEE 53rd Annual Symposium on*  
600 *Foundations of Computer Science*, FOCS ’12, page 140–149, USA, 2012. IEEE Computer  
601 Society.
- 602 [18] Michael I. Jordan and Robert A. Jacobs. Hierarchical mixtures of experts and the em algorithm.  
603 *Neural Comput.*, 6(2):181–214, March 1994.
- 604 [19] Anirban Laha, Saneem Ahmed Chemmengath, Priyanka Agrawal, Mitesh Khapra, Karthik  
605 Sankaranarayanan, and Harish G Ramaswamy. On controllable sparse alternatives to softmax.  
606 In *Advances in Neural Information Processing Systems*, pages 6422–6432, 2018.
- 607 [20] R. Duncan Luce. *Individual Choice Behavior: A Theoretical Analysis*. John Wiley & Sons,  
608 1959.
- 609 [21] Andre Martins and Ramon Astudillo. From softmax to sparsemax: A sparse model of attention  
610 and multi-label classification. In *International Conference on Machine Learning*, pages 1614–  
611 1623, 2016.
- 612 [22] Frank McSherry and Kunal Talwar. Mechanism design via differential privacy. In *Foundations*  
613 *of Computer Science, 2007. FOCS’07. 48th Annual IEEE Symposium on*, pages 94–103. IEEE,  
614 2007.
- 615 [23] Tomas Mikolov, Ilya Sutskever, Kai Chen, Greg S Corrado, and Jeff Dean. Distributed repre-  
616 sentations of words and phrases and their compositionality. In *Advances in neural information*  
617 *processing systems*, pages 3111–3119, 2013.
- 618 [24] Marko Mitrovic, Mark Bun, Andreas Krause, and Amin Karbasi. Differentially private sub-  
619 modular maximization: Data summarization in disguise. In *ICML*, 2017.
- 620 [25] Jamie H Morgenstern and Tim Roughgarden. On the pseudo-dimension of nearly optimal  
621 auctions. In *Advances in Neural Information Processing Systems*, pages 136–144, 2015.
- 622 [26] Frederic Morin and Yoshua Bengio. Hierarchical probabilistic neural network language model.  
623 In *Aistats*, volume 5, pages 246–252. Citeseer, 2005.
- 624 [27] Roger B Myerson. Optimal auction design. *Mathematics of operations research*, 6(1):58–73,  
625 1981.
- 626 [28] Jiří Rohn. Computing the norm  $\|a\|_{\infty, 1}$  is  $np$ -hard\*. *Linear and Multilinear Algebra*,  
627 47(3):195–204, 2000.

- 628 [29] Tim Roughgarden, Inbal Talgam-Cohen, and Qiqi Yan. Supply-limiting mechanisms. In *Pro-*  
629 *ceedings of the 13th ACM Conference on Electronic Commerce*, pages 844–861. ACM, 2012.
- 630 [30] Richard S. Sutton and Andrew G. Barto. *Reinforcement Learning: An Introduction*. A Bradford  
631 Book, Cambridge, MA, USA, 2018.
- 632 [31] Edward Charles Titchmarsh and David Rodney Heath-Brown. *The theory of the Riemann*  
633 *zeta-function*. Oxford University Press, 1986.
- 634 [32] Pascal Vincent, Alexandre De Brébisson, and Xavier Bouthillier. Efficient exact gradient up-  
635 date for training deep networks with very large sparse targets. In *Advances in Neural Informa-*  
636 *tion Processing Systems*, pages 1108–1116, 2015.
- 637 [33] Irving L zGlicksberg. A further generalization of the kakutani fixed point theorem, with  
638 application to nash equilibrium points. *Proceedings of the American Mathematical Society*,  
639 3(1):170–174, 1952.
